# Supplementary material
Source: publisher figshare collection journal article supplement (https://acs.figshare.com/ndownloader/files/11300402)

## Modular Synthesis of $\beta$ -Amino Boronate Peptidomimetics

Sherif J. Kaldas,<sup>†,§</sup> Tatiana Rogova,<sup>†,§</sup> Dr. Valentine G. Nenajdenko,<sup>‡</sup>  
Dr. Andrei K. Yudin<sup>\*,†</sup>

---

<sup>§</sup>These authors contributed equally.

<sup>†</sup>Davenport Research Laboratories, Department of Chemistry, University of Toronto, 80 St. George St. Toronto, ON, Canada, M5S 3H6

<sup>‡</sup>Department of Chemistry, Lomonosov Moscow State University, 119899 Moscow, Russia

<sup>\*</sup>Corresponding Author: Dr. Andrei K. Yudin, E-mail: ayudin@chem.utoronto.ca

| Page | Contents                           |
|------|------------------------------------|
| S2   | Table S1 Ugi Reaction Optimization |
| S3   | pH Study                           |
| S4   | Oxaborolane Study                  |
| S5   | NMR Spectra                        |

## Reaction Optimization

Table S1. Optimization experiments for the Ugi-reaction with  $\alpha$ -borylaldehydes.

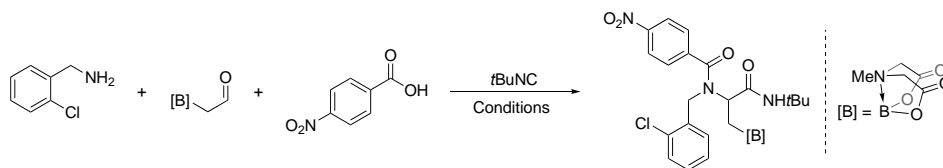

| Entry | Solvent (M)  | Conditions                                                   | T (°C)          | Time (h) | Yield <sup>a</sup> |
|-------|--------------|--------------------------------------------------------------|-----------------|----------|--------------------|
| 1     | MeCN (1.0 M) | 1.0 equiv amine and carboxylic acid, 1.0 equiv isocyanide    | 25              | 24       | 0%                 |
| 2     | MeCN (0.5 M) | 1.0 equiv amine and carboxylic acid, 1.0 equiv isocyanide    | 25              | 24       | 50%                |
| 3     | DMSO (0.2 M) | 1.0 equiv of amine and carboxylic acid, 1.2 equiv isocyanide | 120, $\mu$ wave | 2        | 16%                |
| 4     | DMSO (1.0 M) | 1.0 equiv of amine and carboxylic acid, 1.2 equiv isocyanide | 100, $\mu$ wave | 3        | 29%                |
| 5     | MeCN (0.1 M) | 1.2 equiv amine and carboxylic acid, 2.0 equiv isocyanide    | 60              | 24       | 75%                |

<sup>a</sup>NMR yield of the desired product.

### pH Titration

**General Procedure:** To a solution compound **3b** (20. mg, 0.05 mmol) in 2.0 ml of CD<sub>3</sub>OD was added 0.6 ml of HEPES buffer (0.10 M in D<sub>2</sub>O) and was left to stir for 5 min. The pH was adjusted to ~3 by dropwise addition of 2.0 M HClO<sub>4</sub> in D<sub>2</sub>O. A 200  $\mu$ L aliquot was taken for <sup>1</sup>H and <sup>11</sup>B NMR. The pH was increased by ~1 pH unit by addition of 2.0 M NaOH(aq) in D<sub>2</sub>O until a pH of ~12.5 was reached. At each pH, a 200  $\mu$ L aliquot was taken for NMR. This experiment was repeated in duplicate.

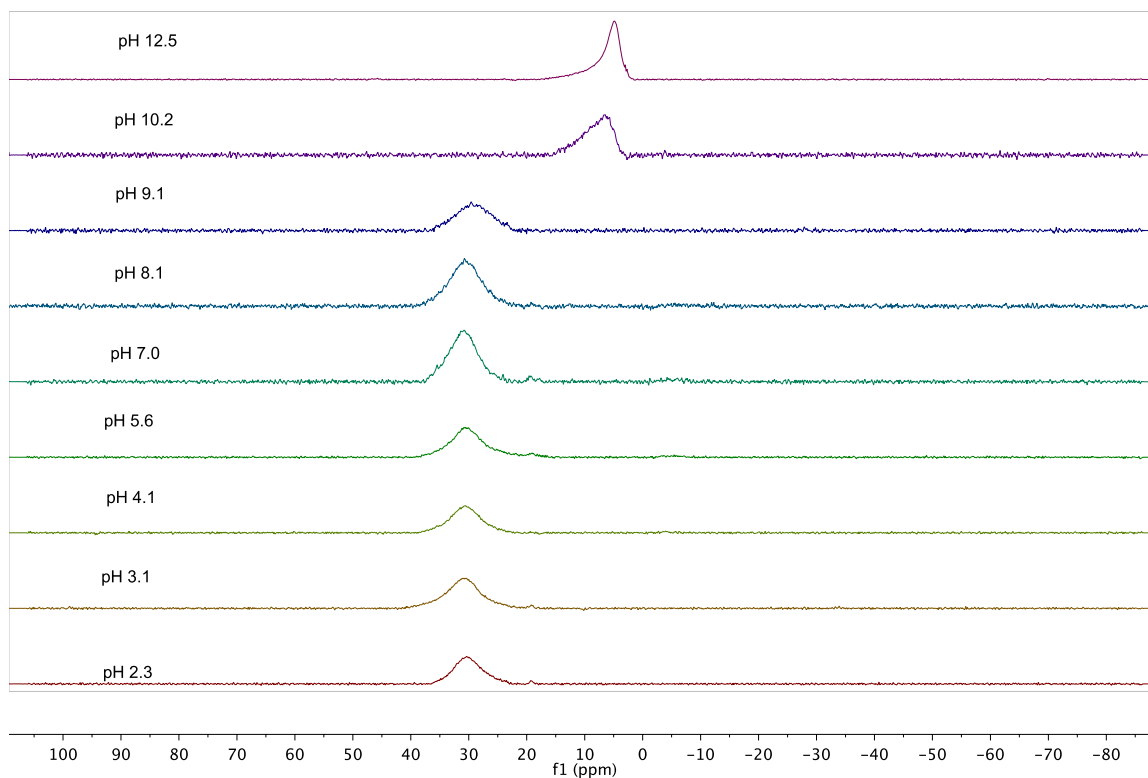

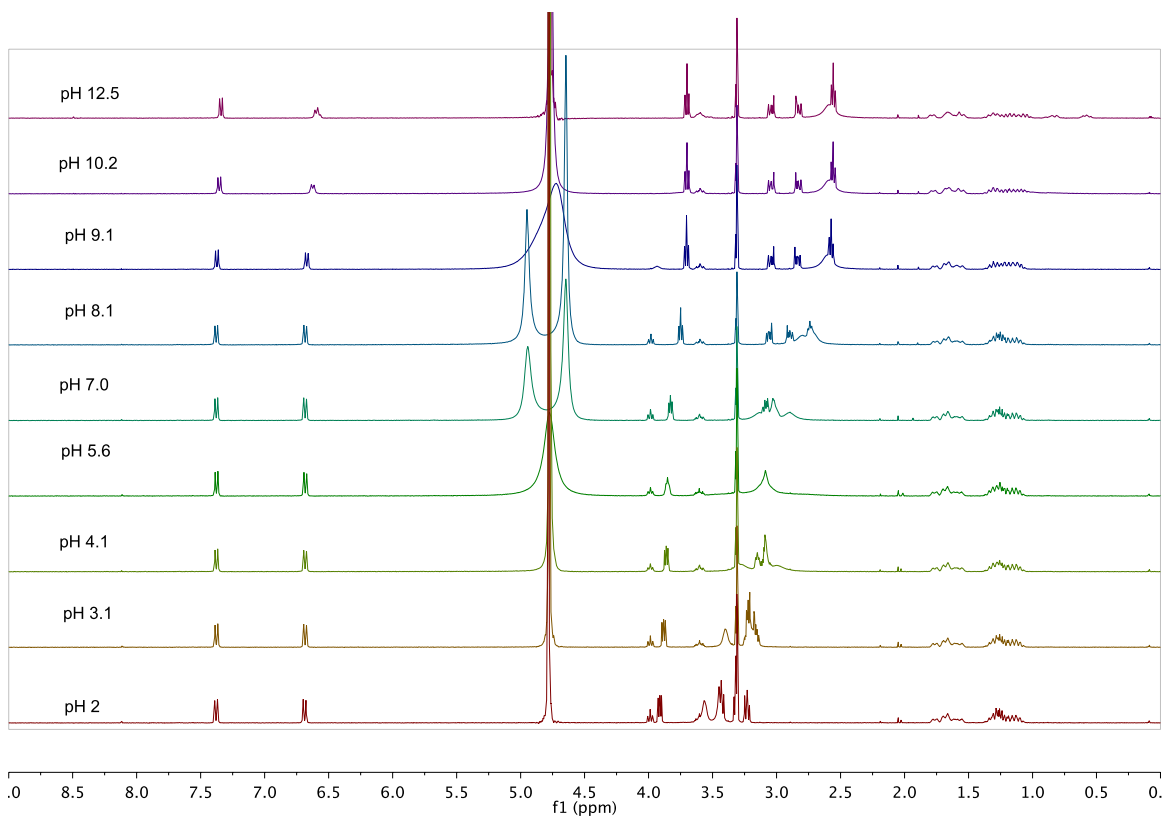

After 1 week at pH 2 and pH 12 in  $\text{CD}_3\text{OD}$  there was no observable decomposition by proton or boron NMR.

#### pH 2:

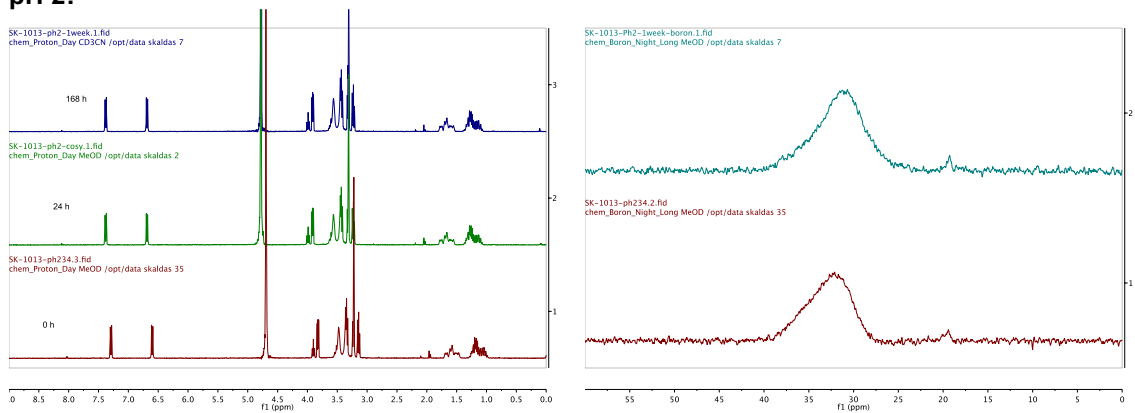

**pH 12:**

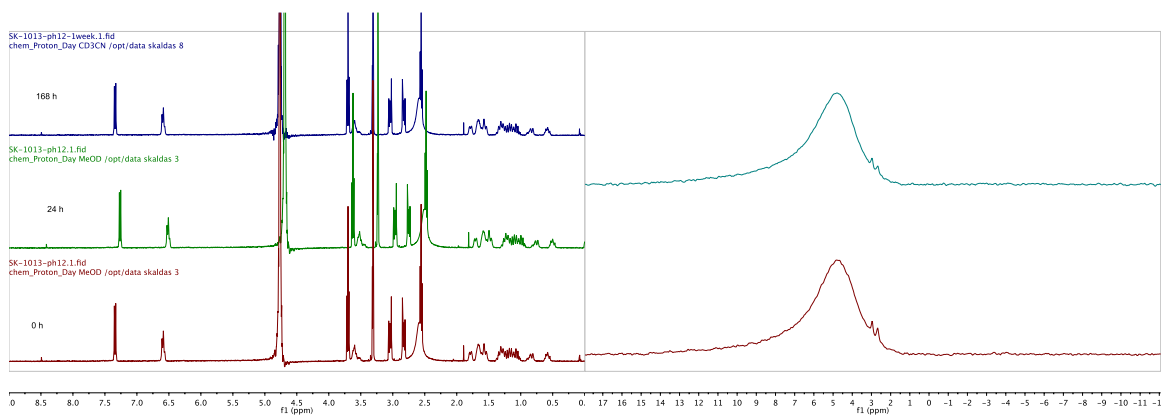

### Oxaborolane Study

**General Procedure:** Compound **3a** was dissolved in deuterated methanol (0.05 M) and  $^{11}\text{B}$  NMR (128 MHz) analysis was carried out at 10 °C, 25 °C, and 50 °C.

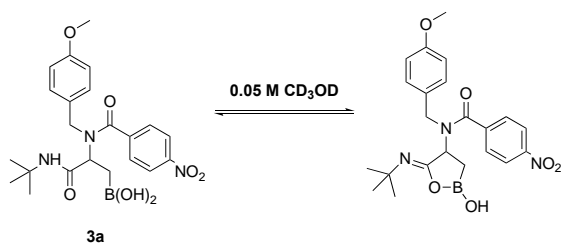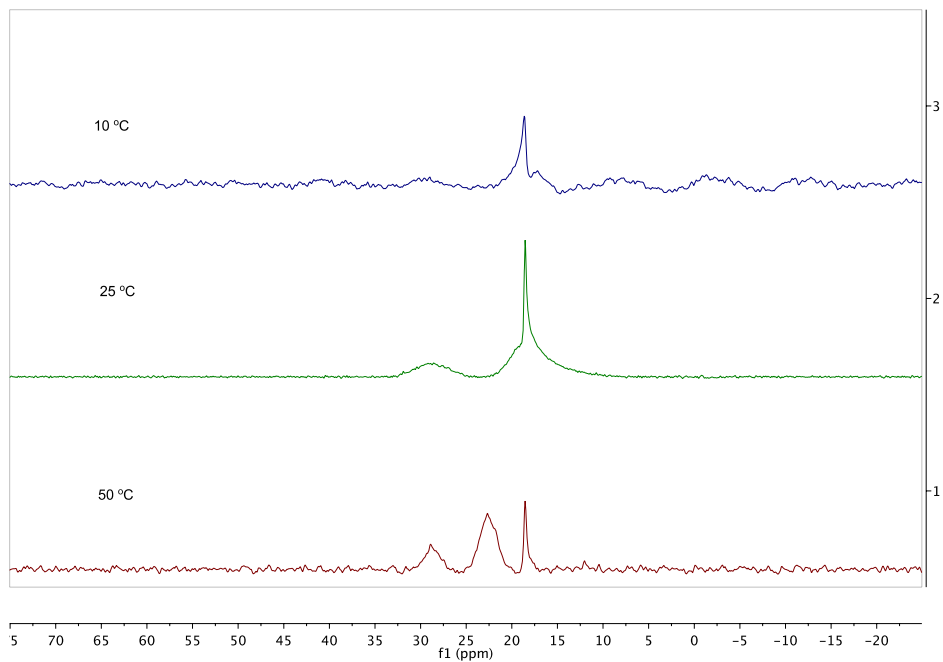

# **NMR Spectra**

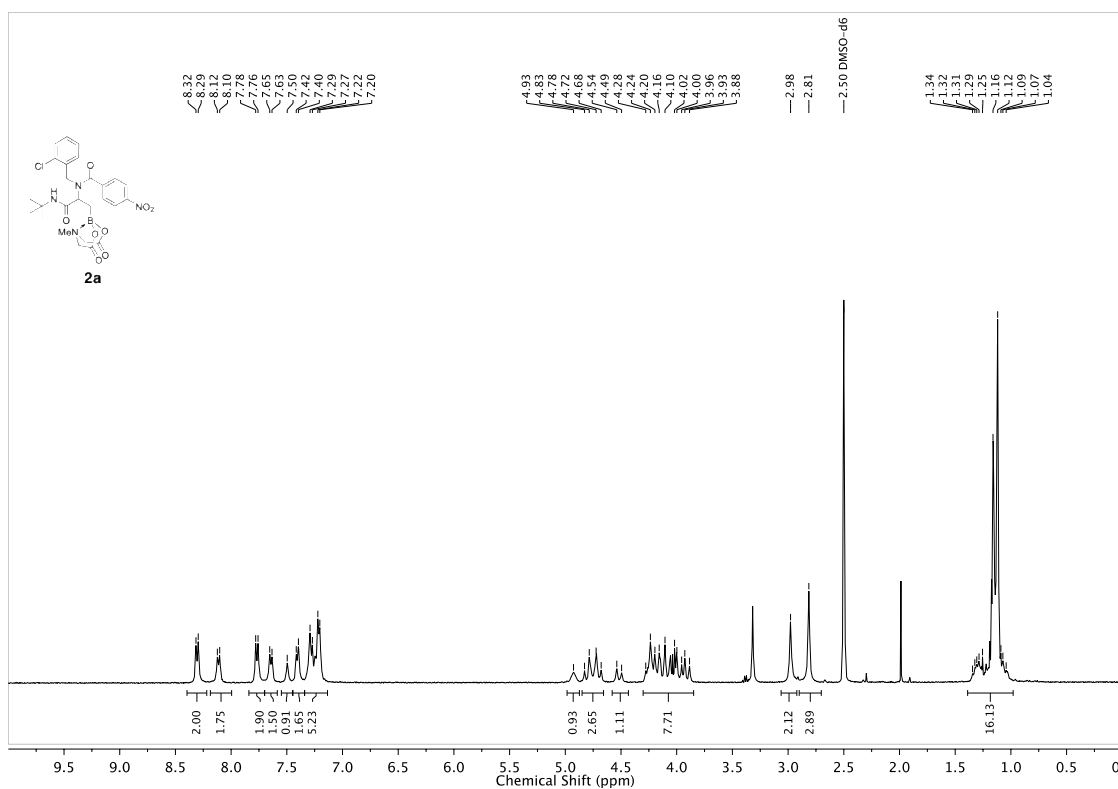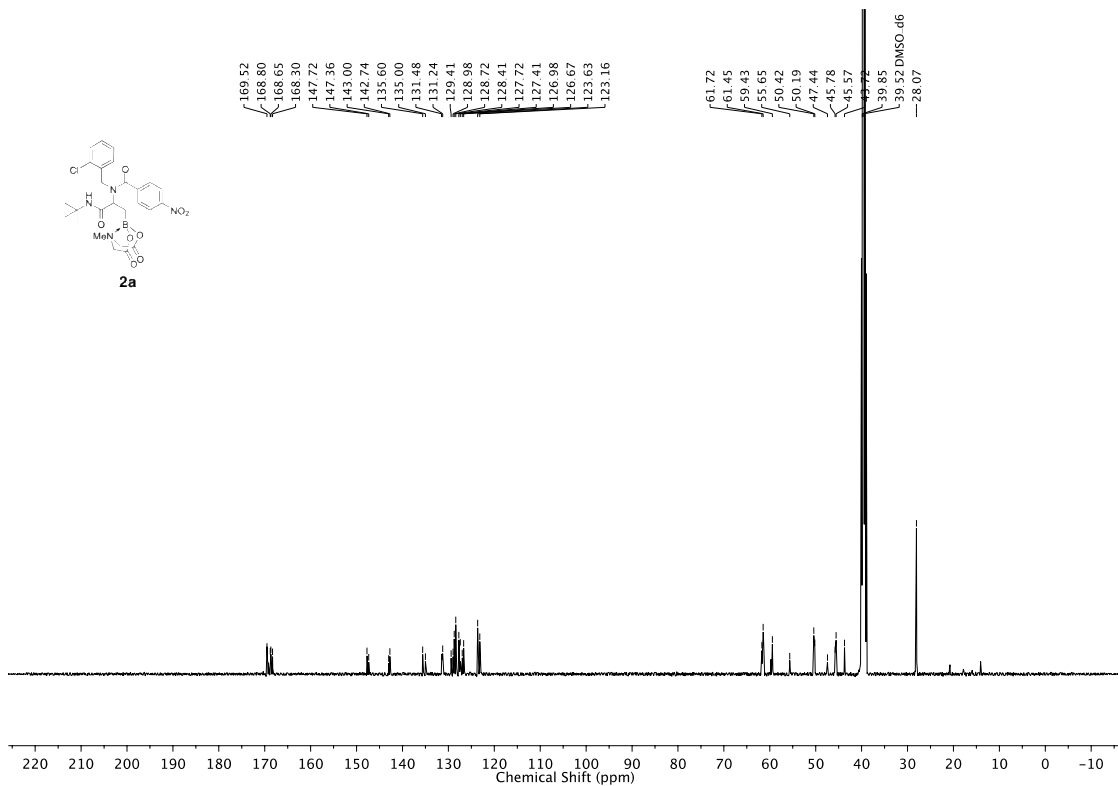

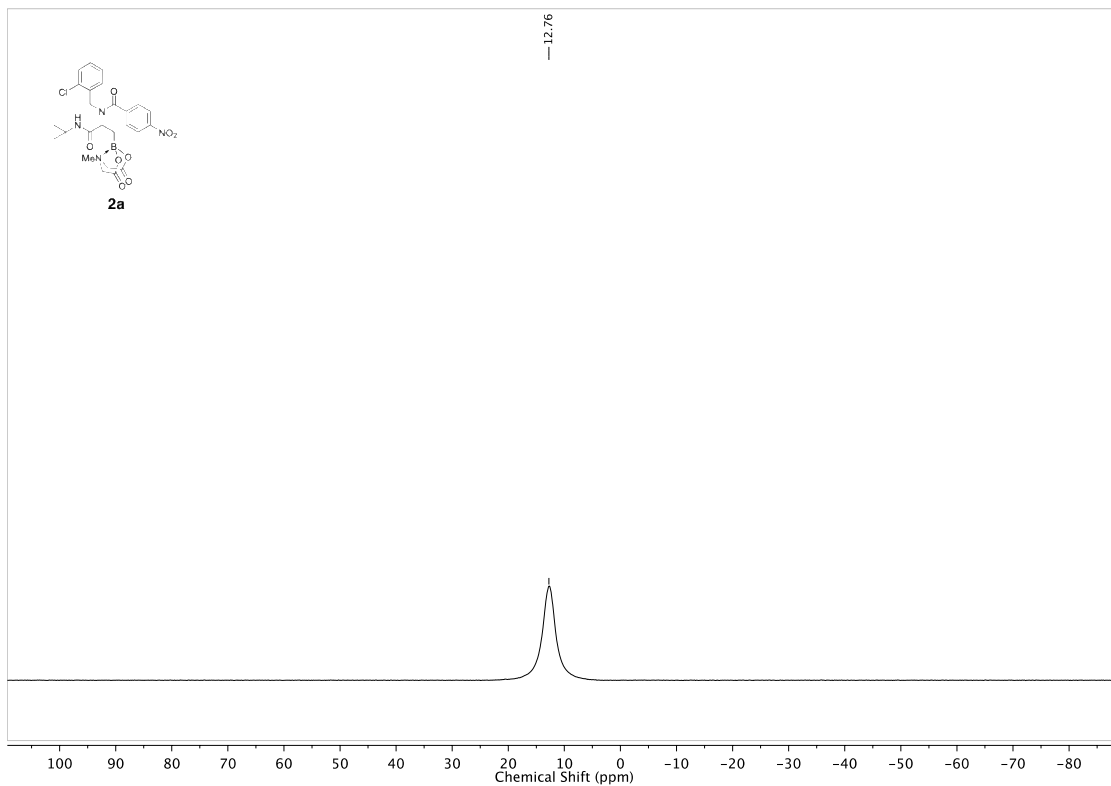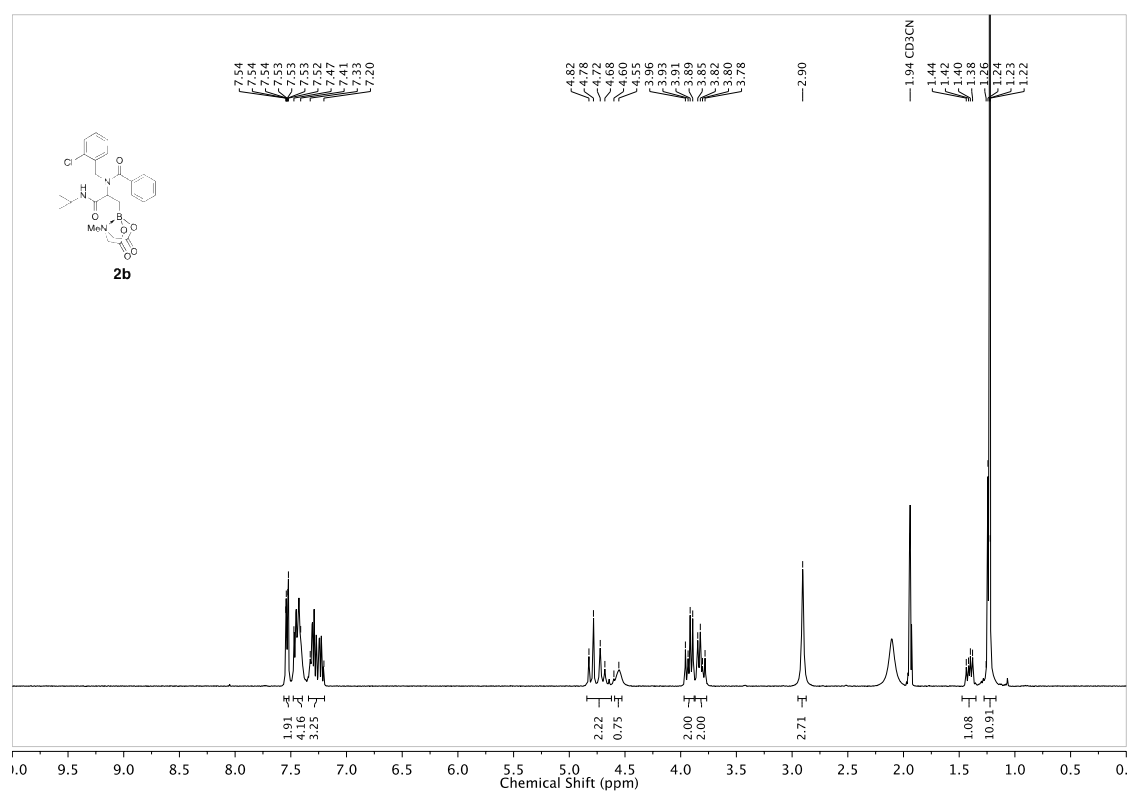

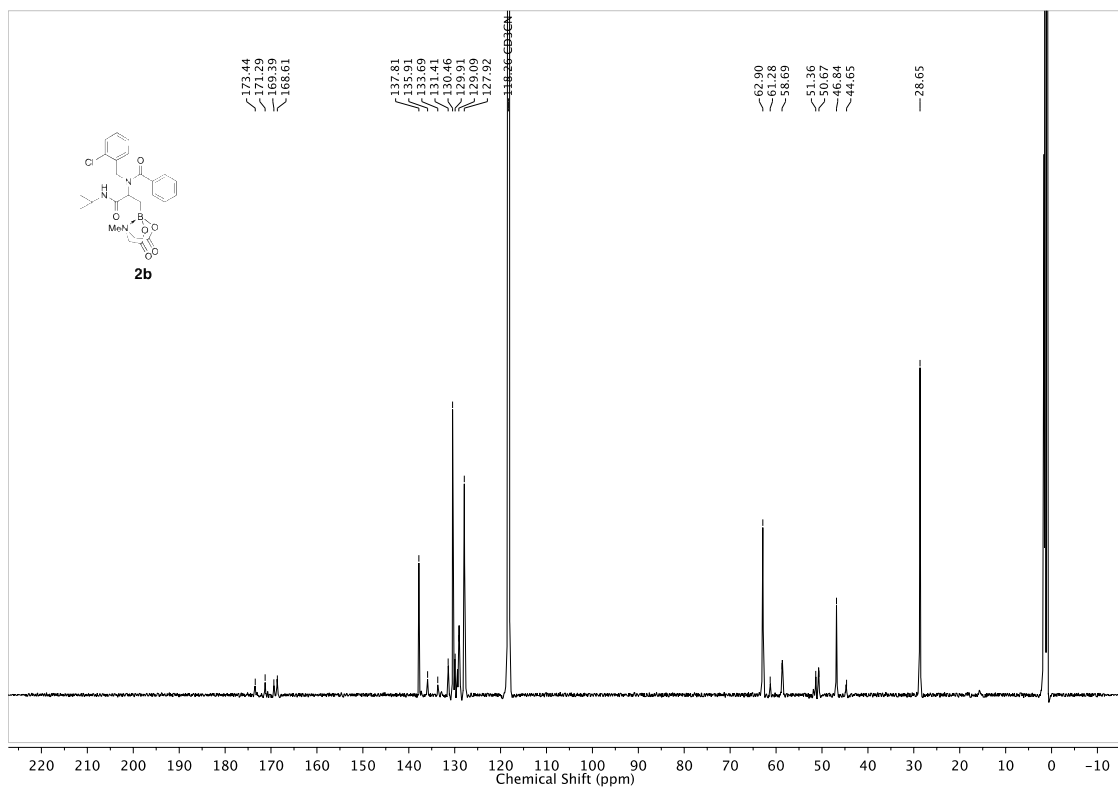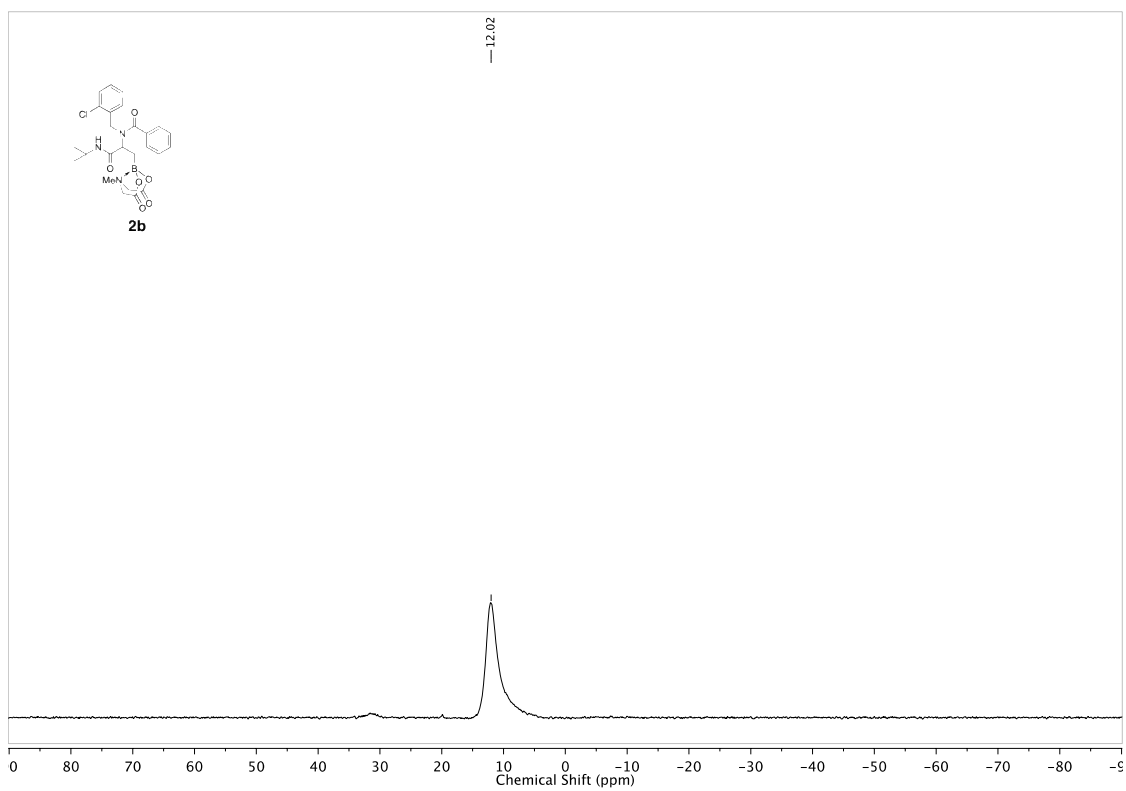



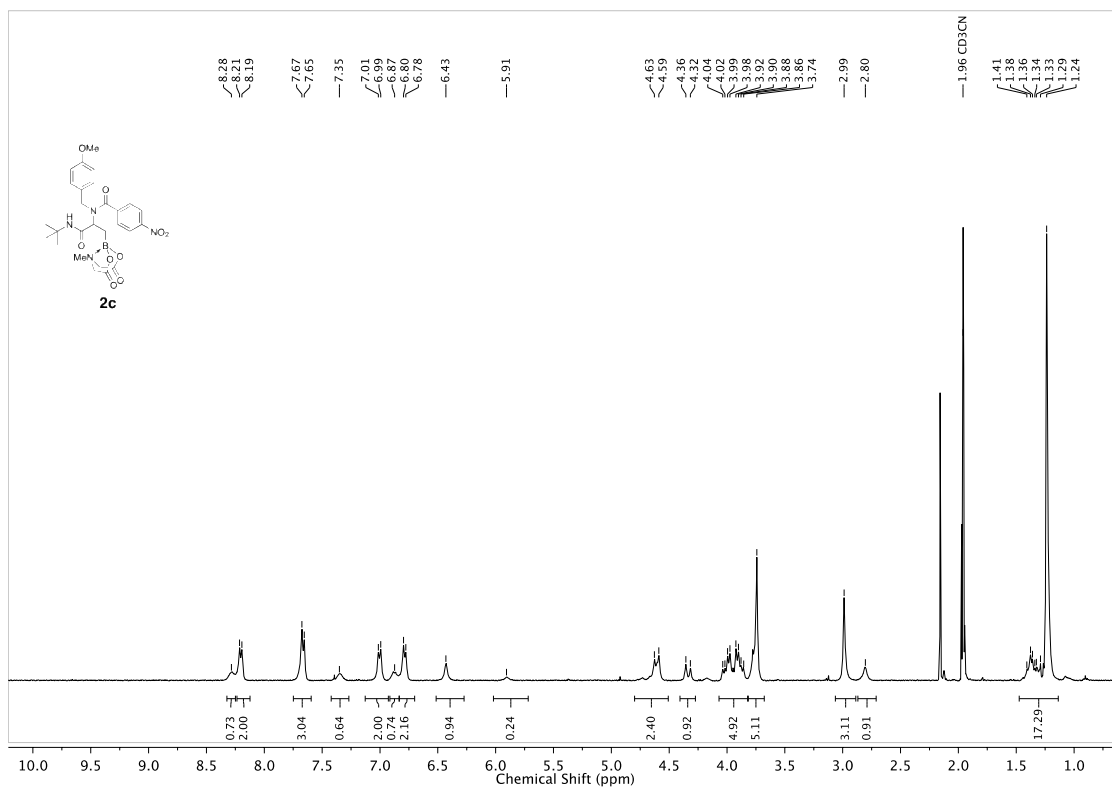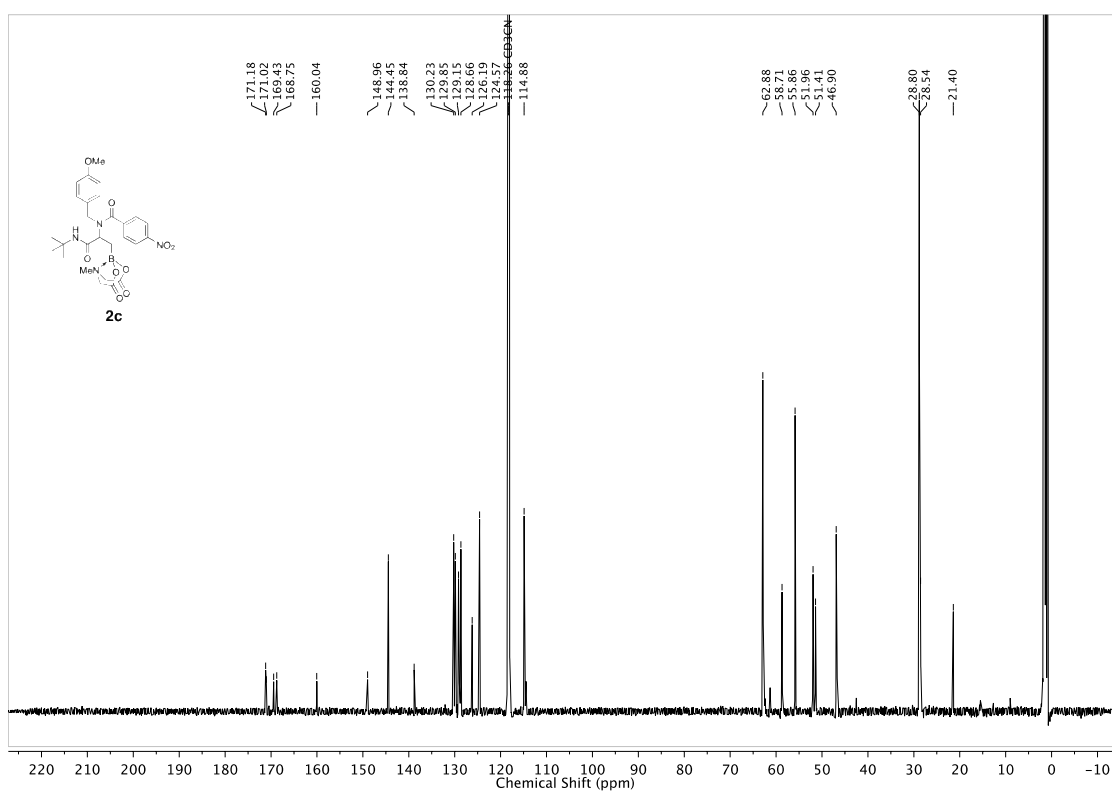

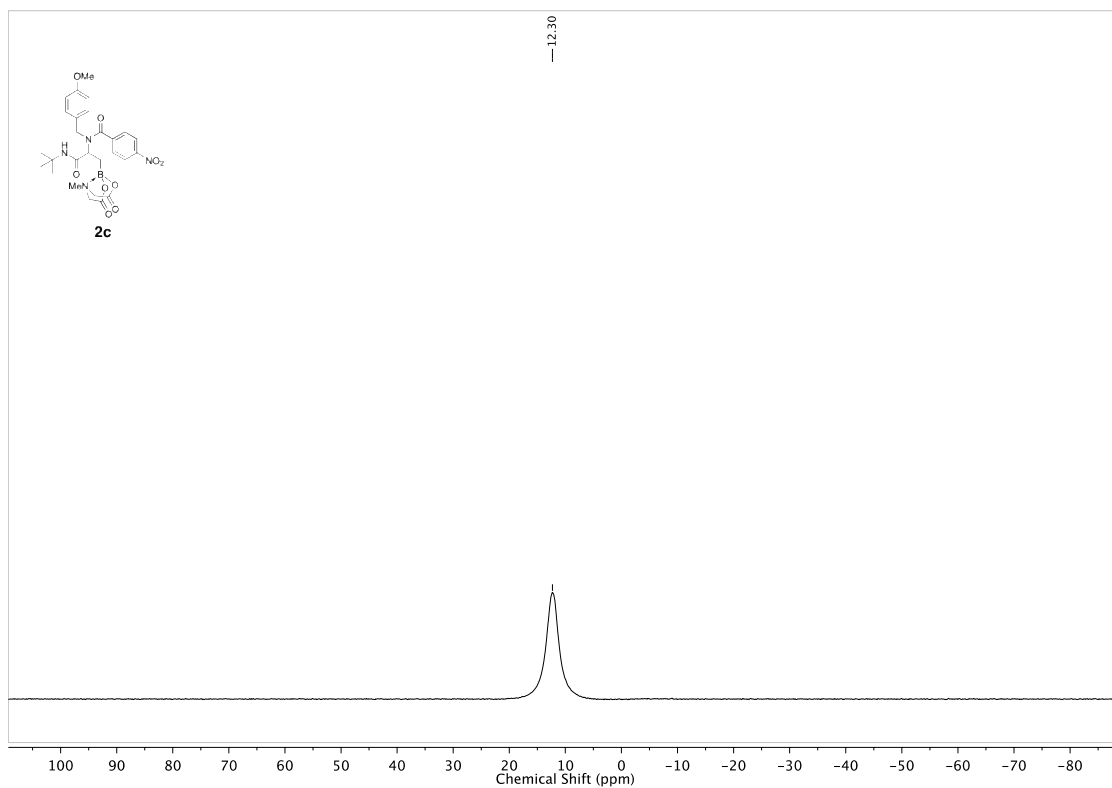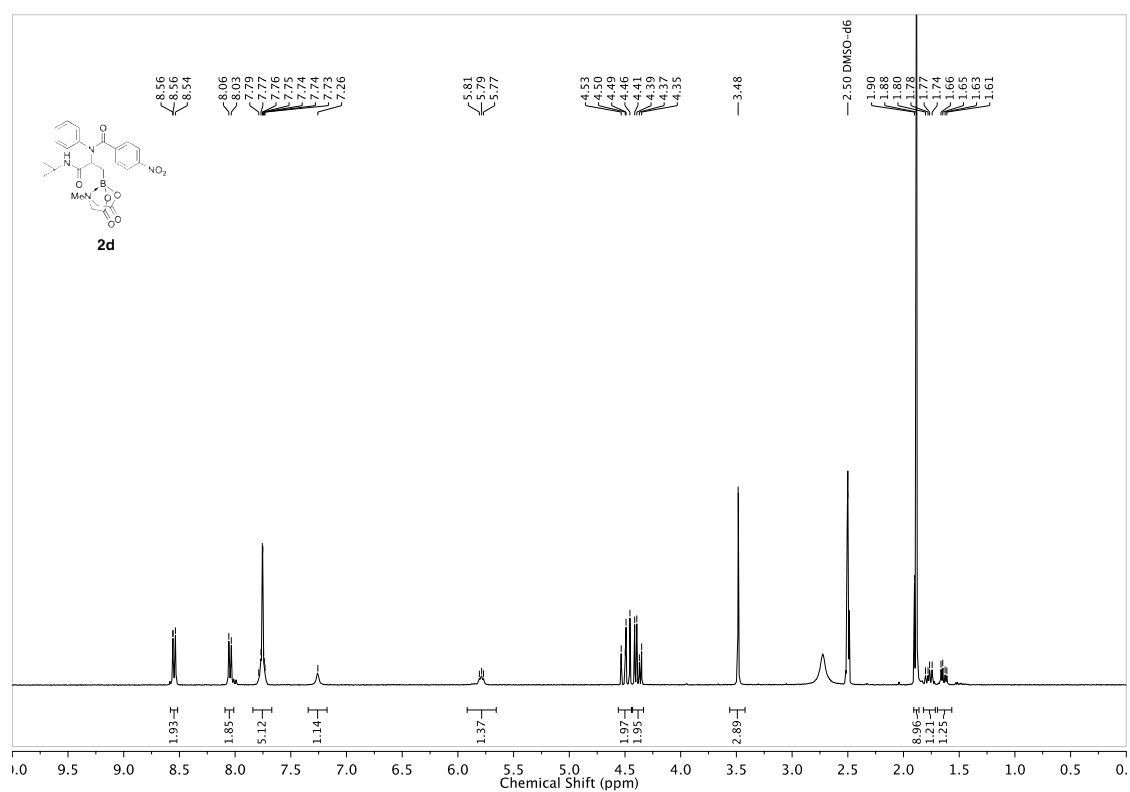

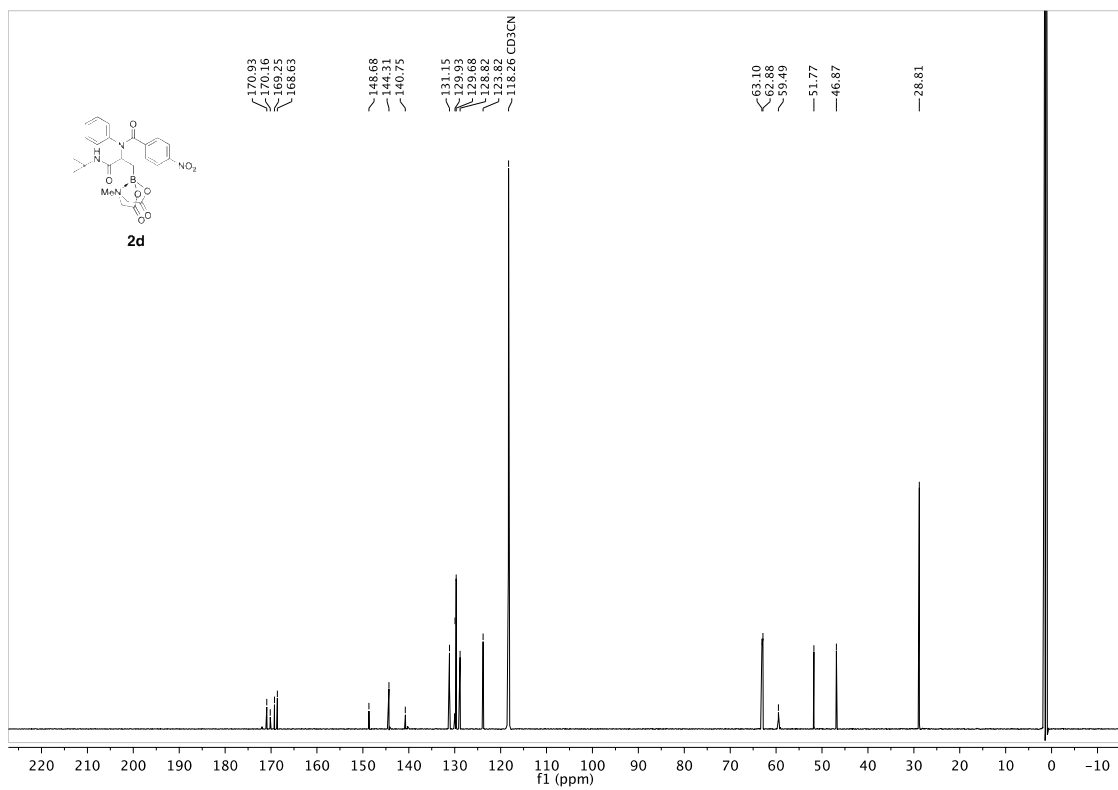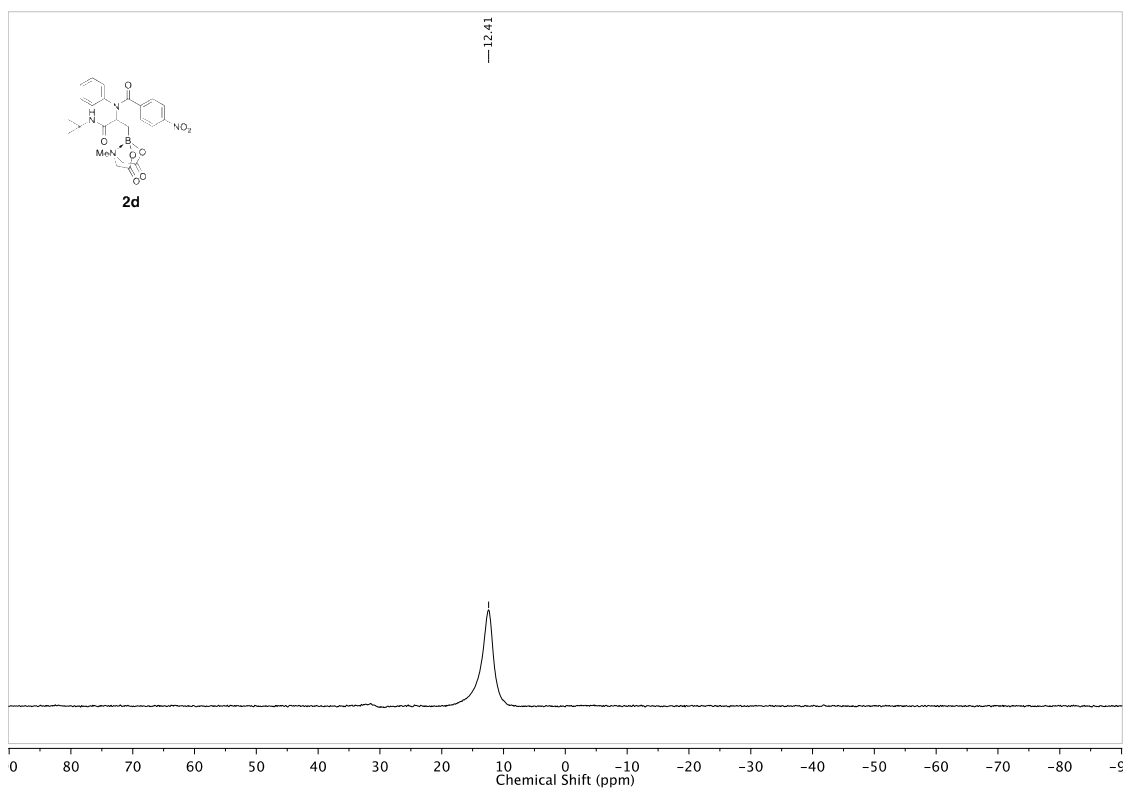

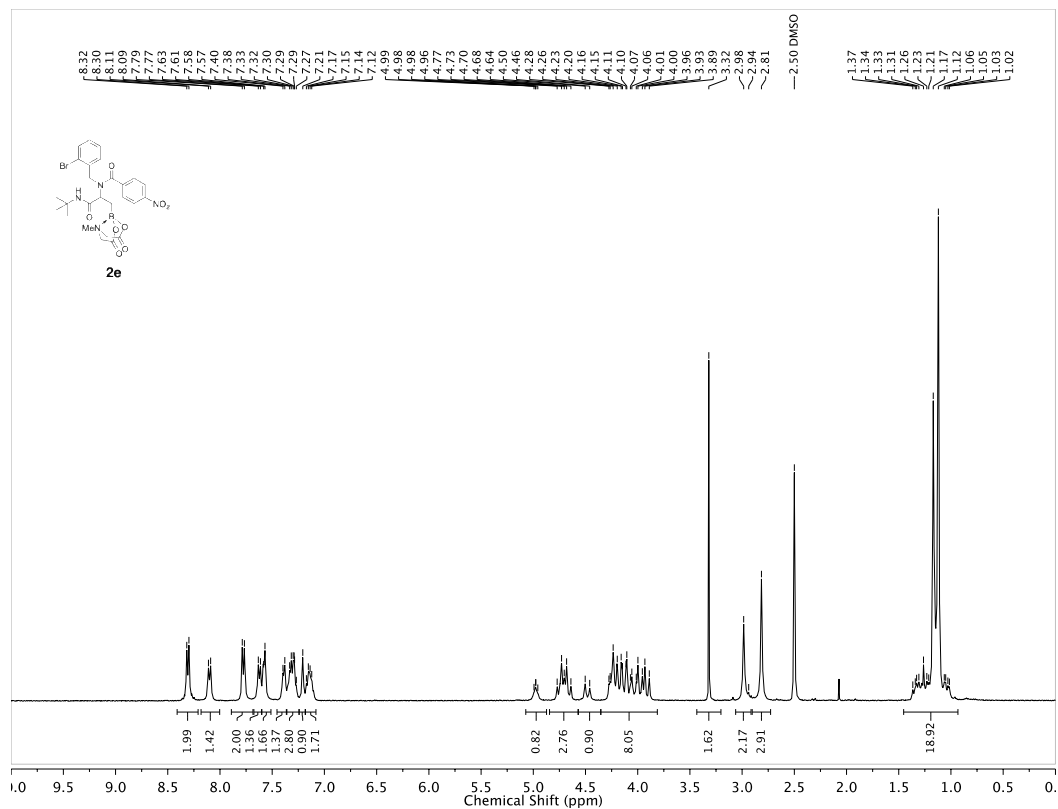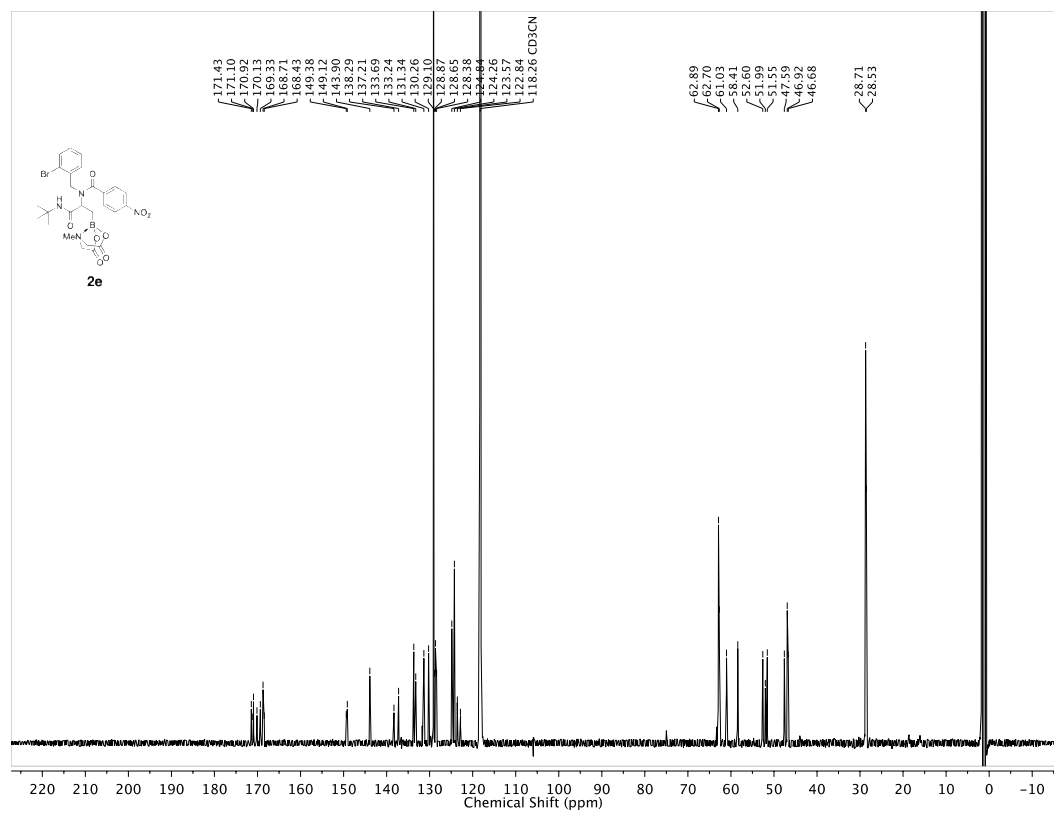

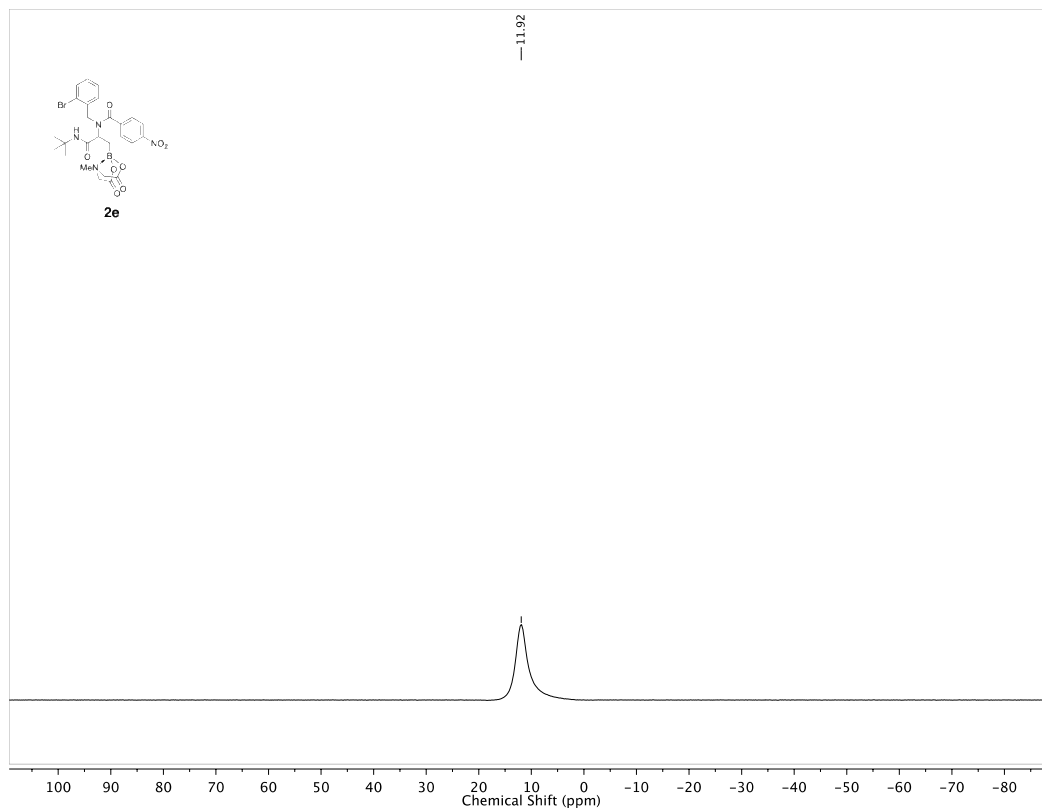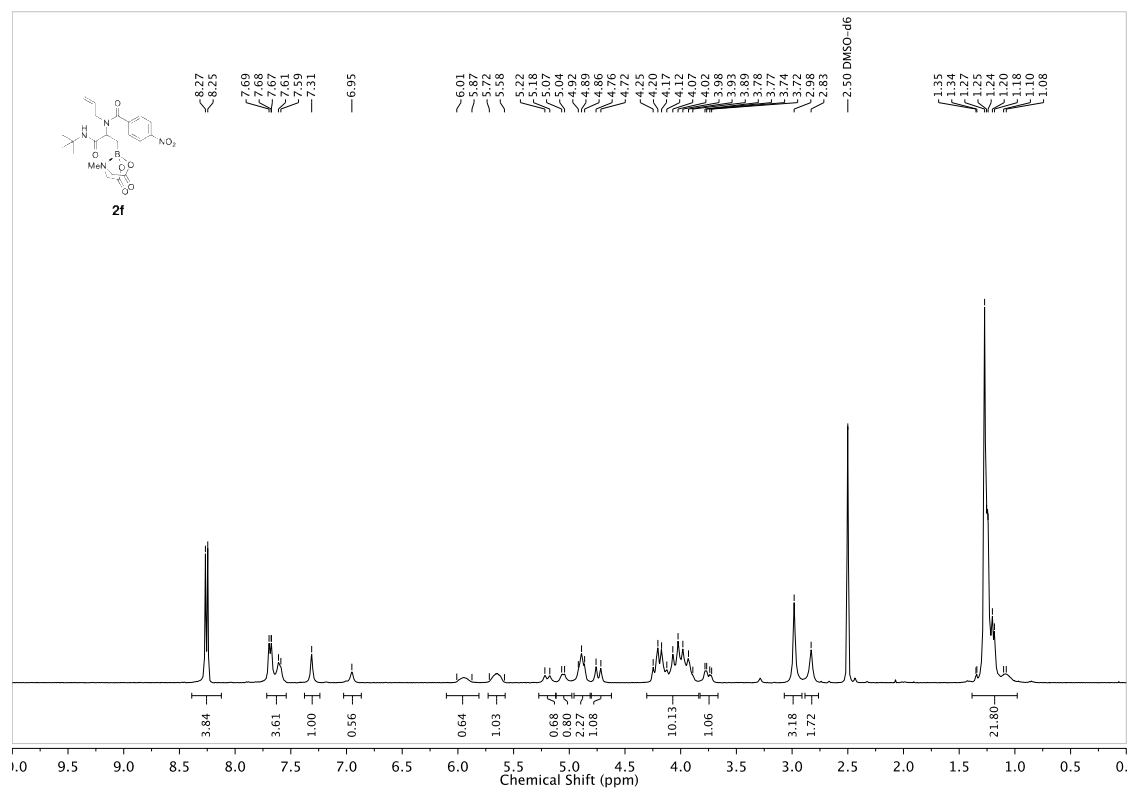

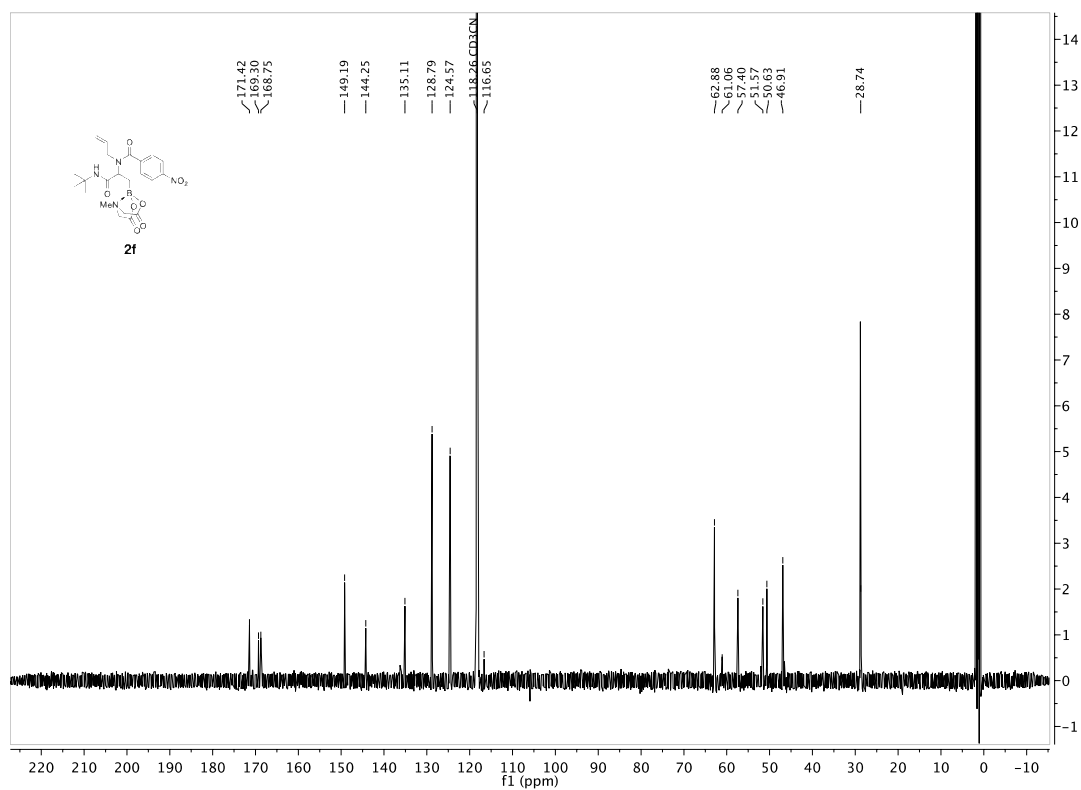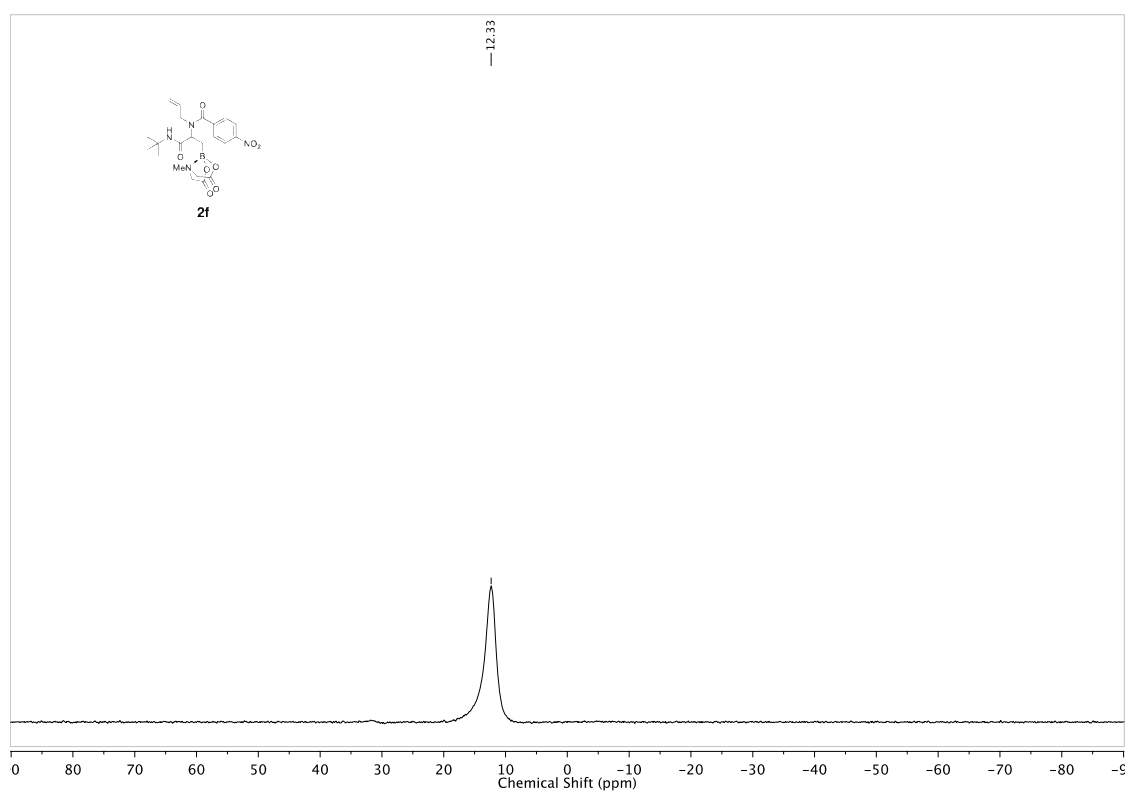

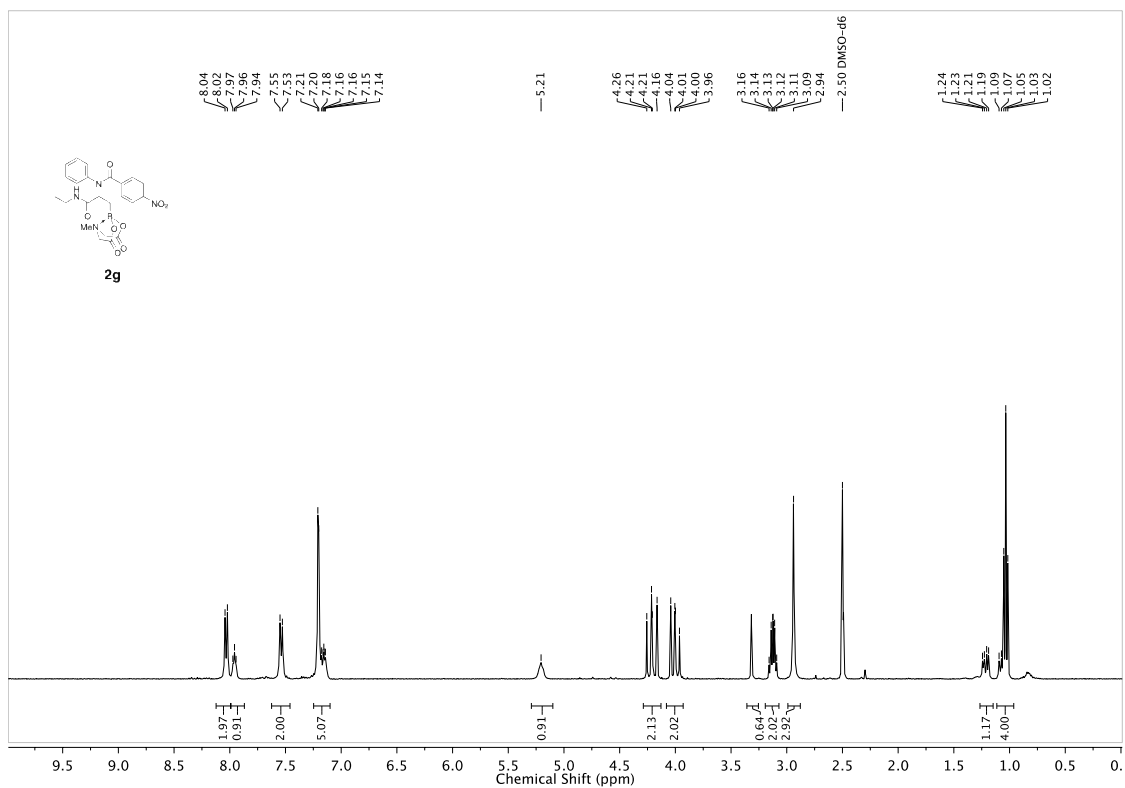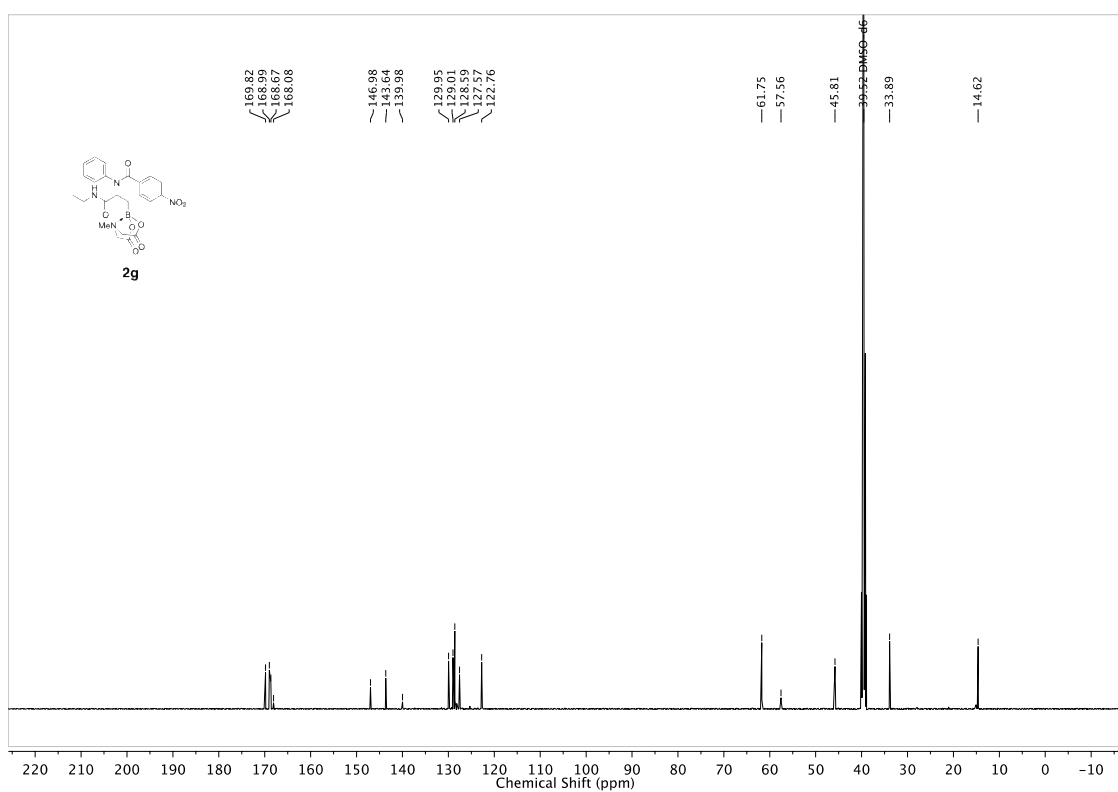

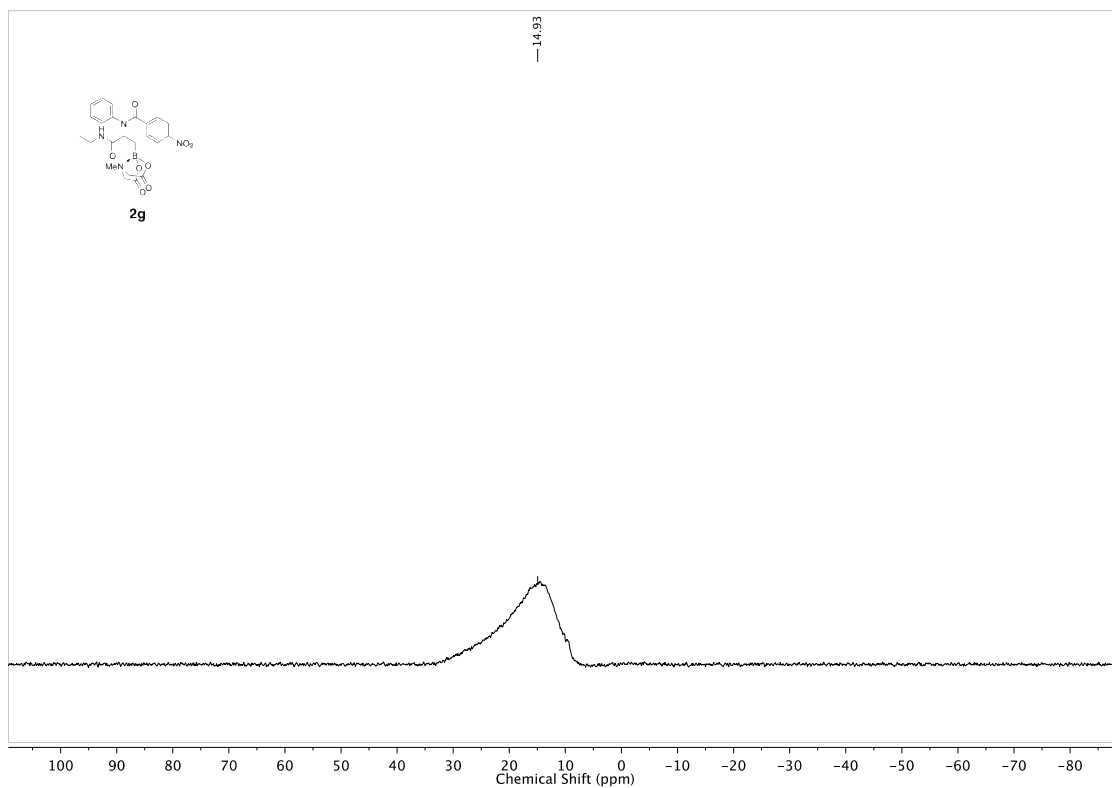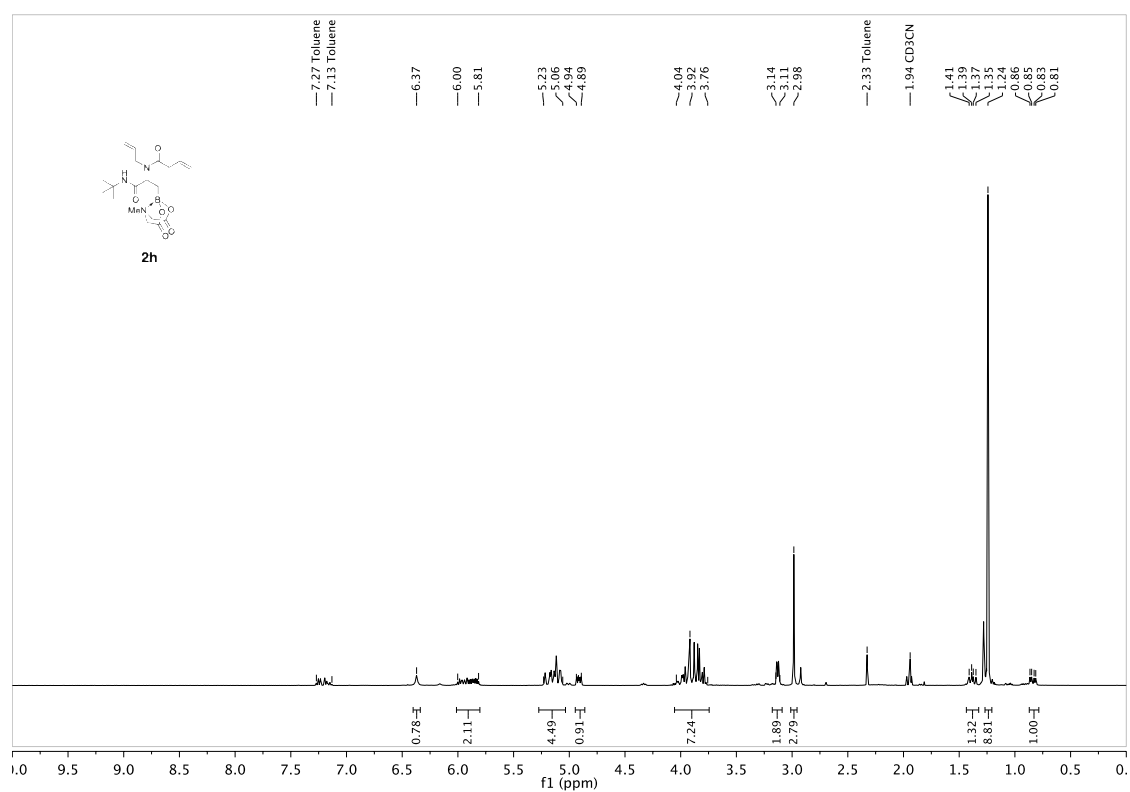



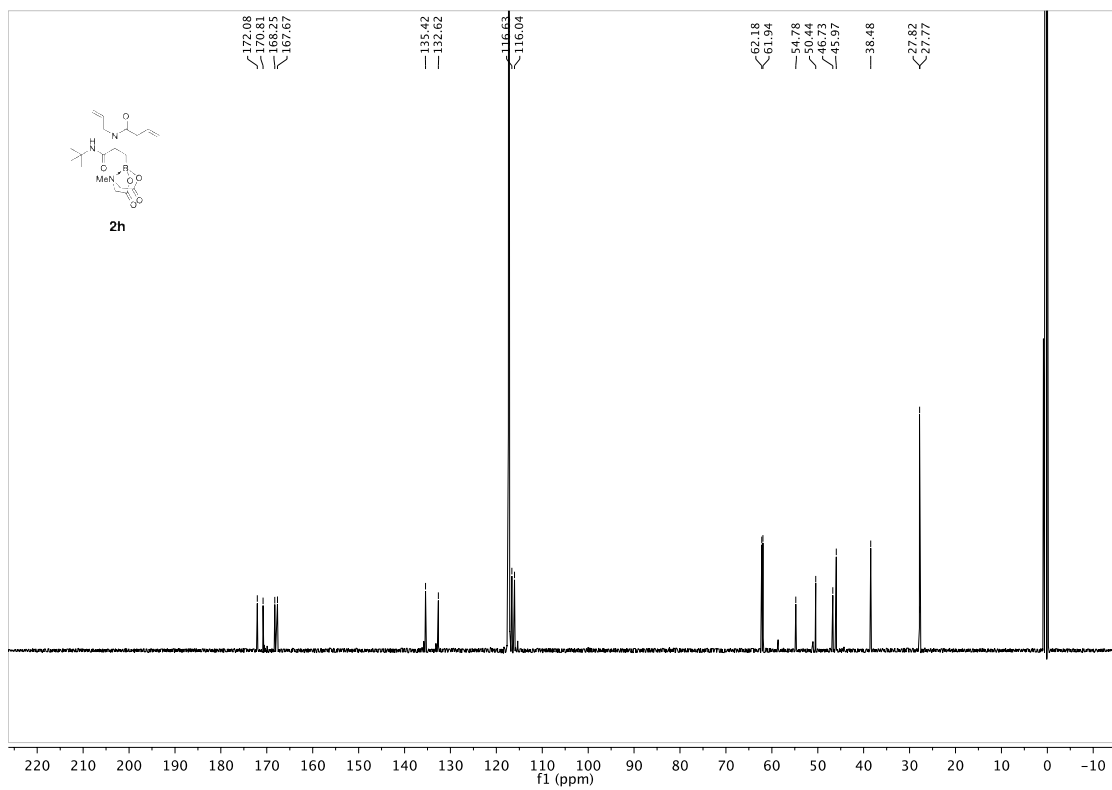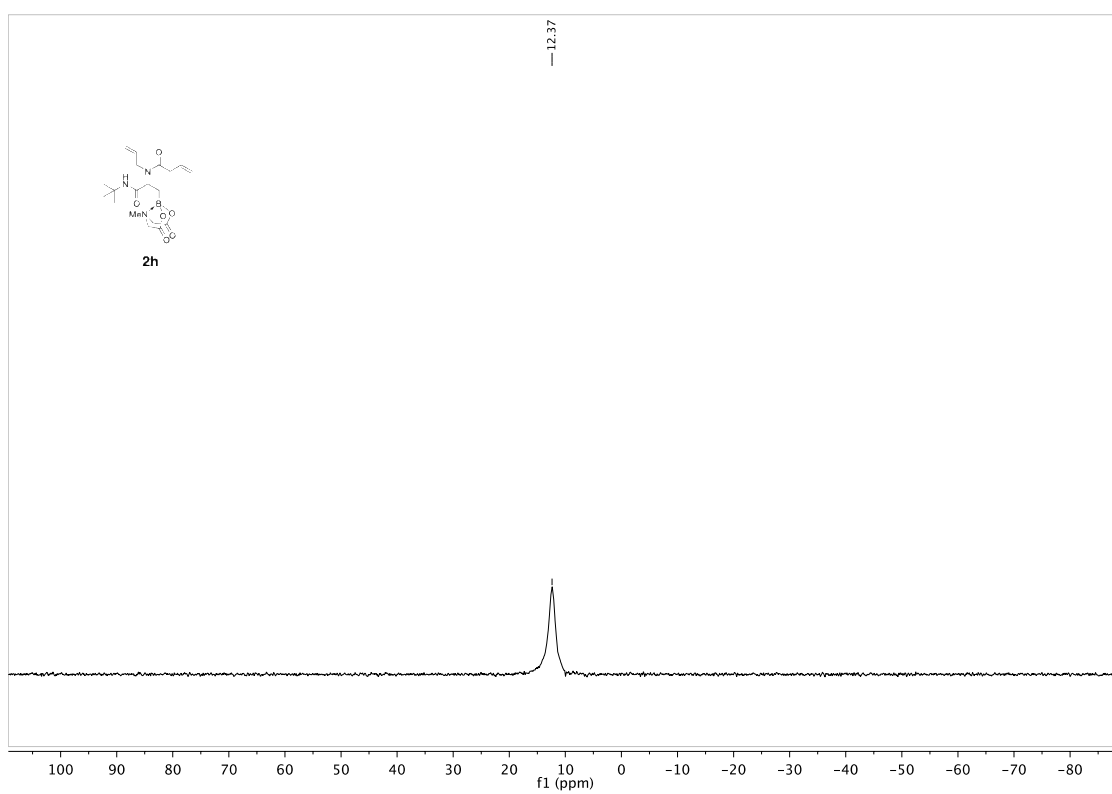

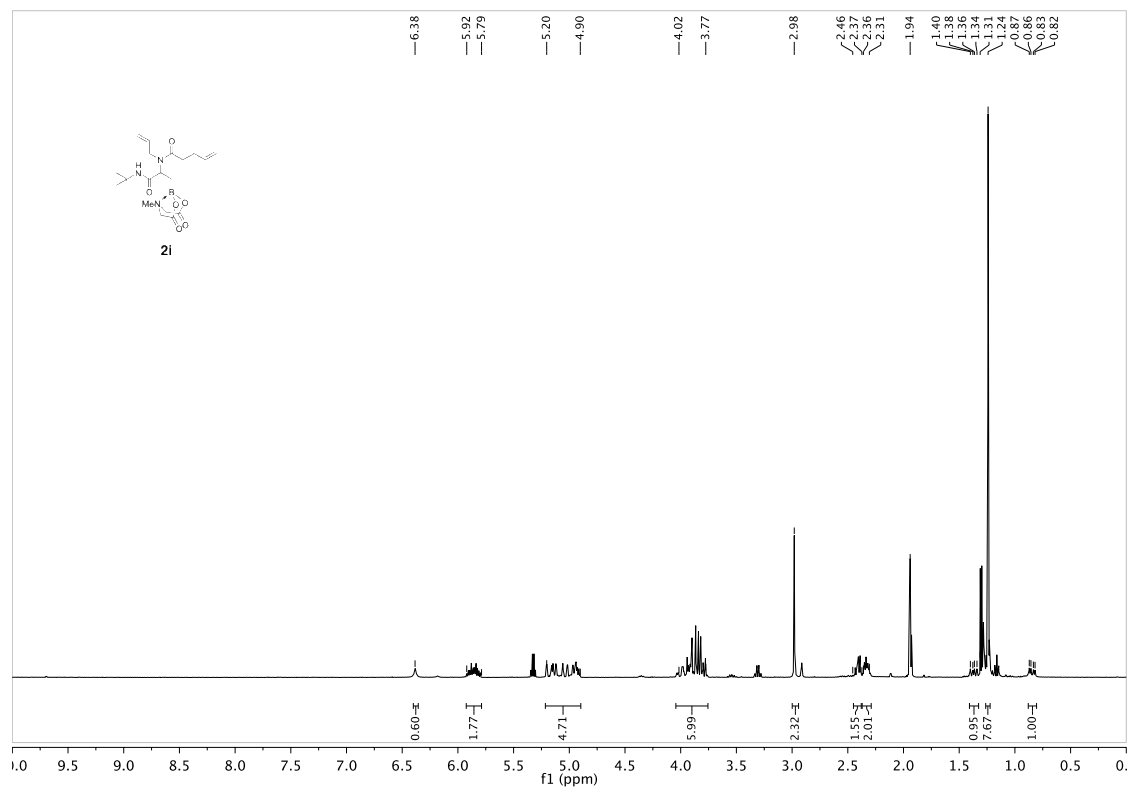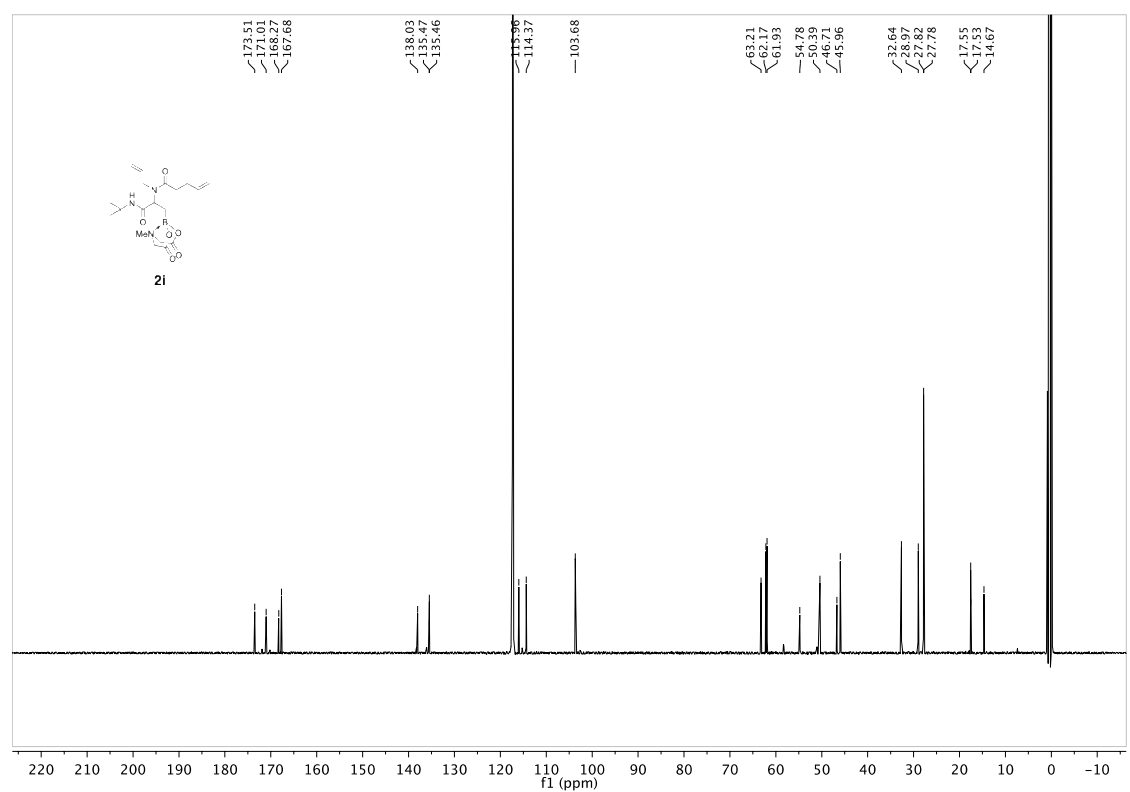

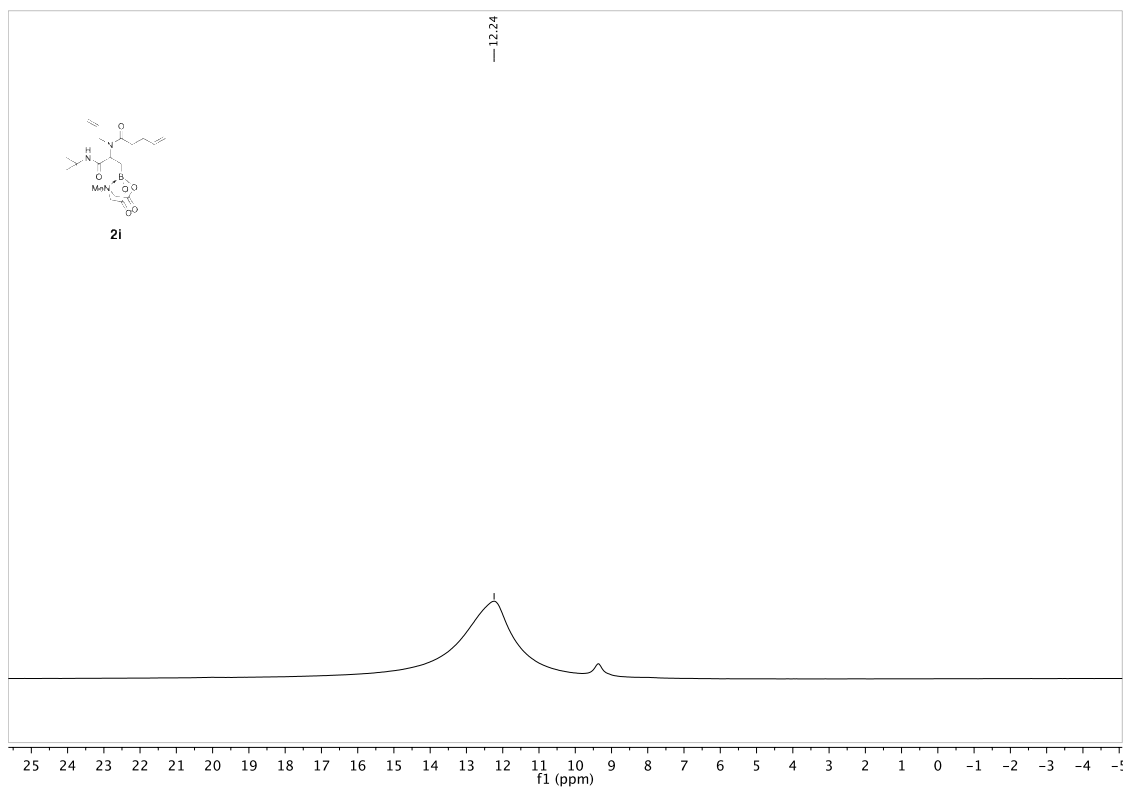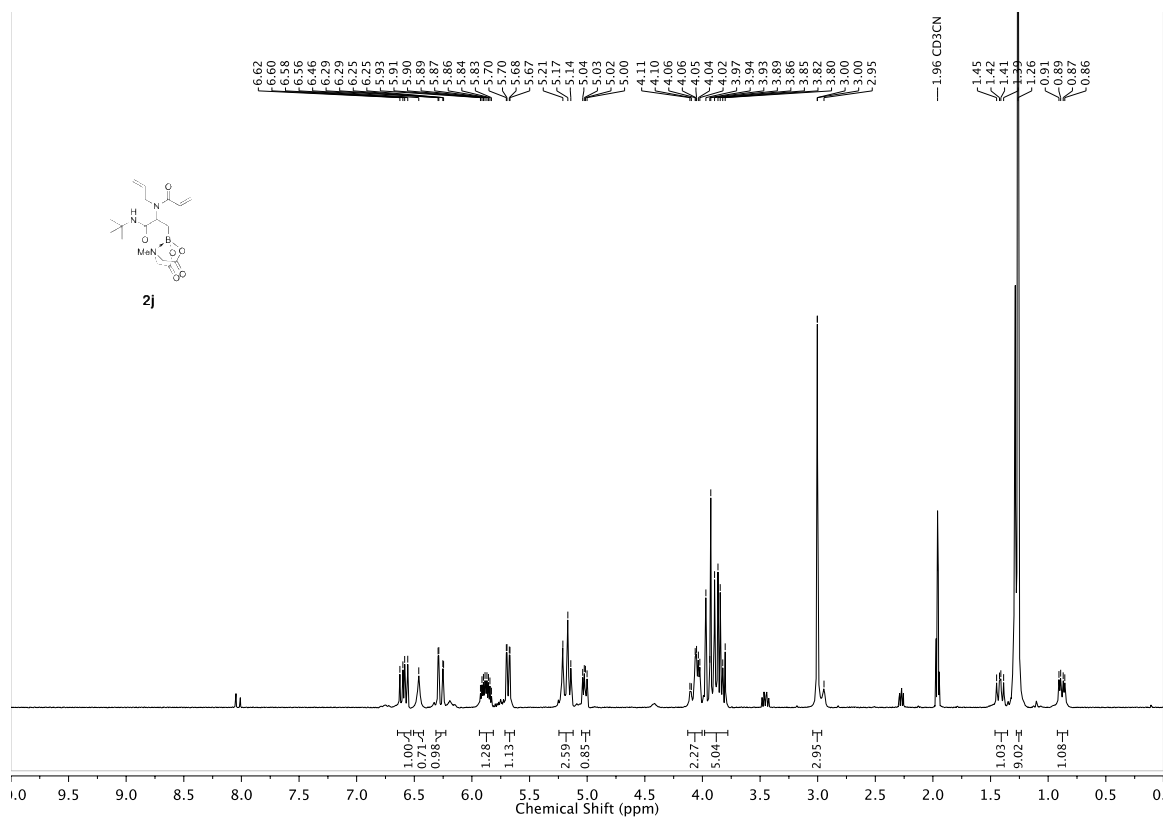

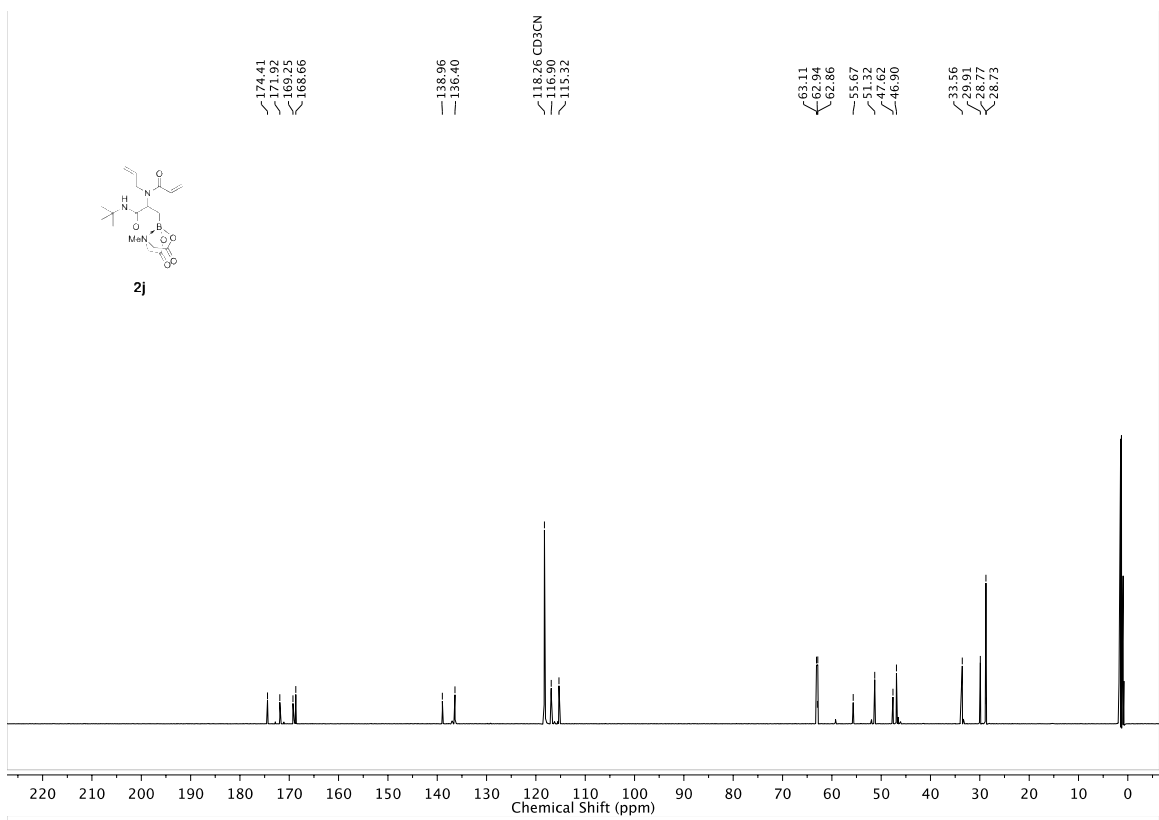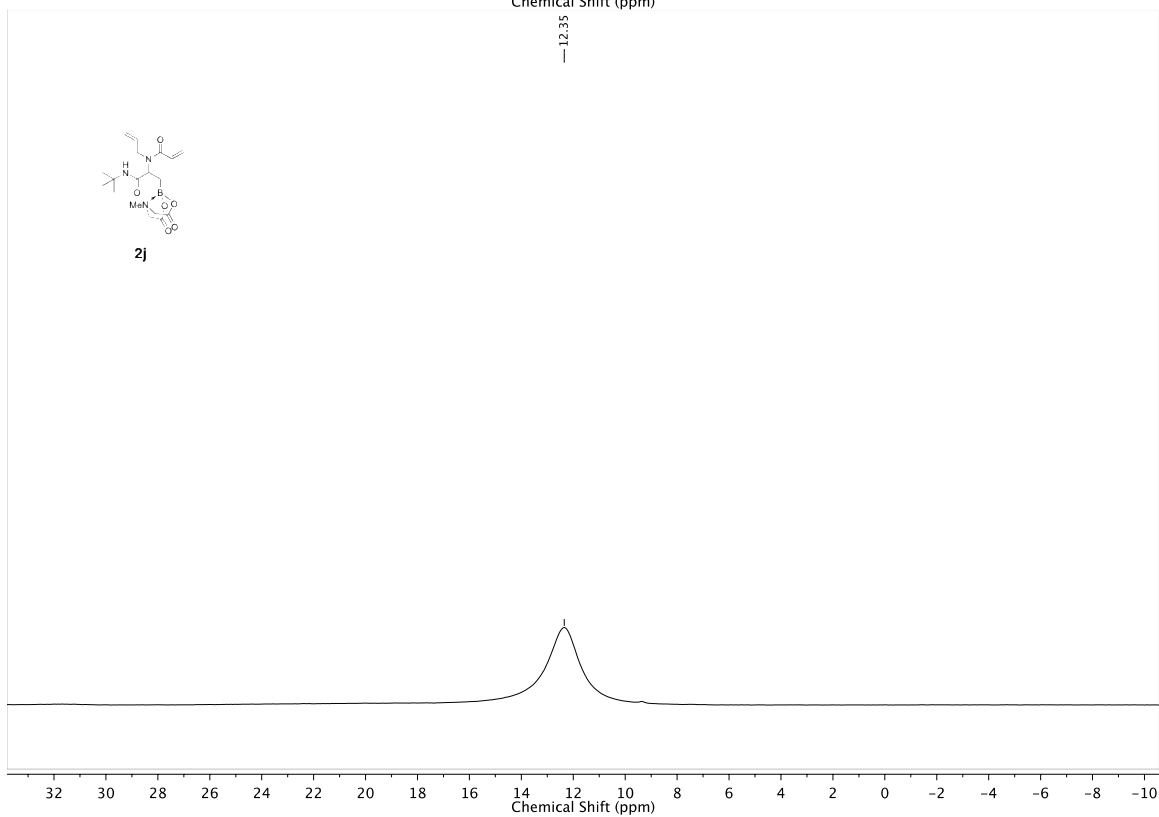

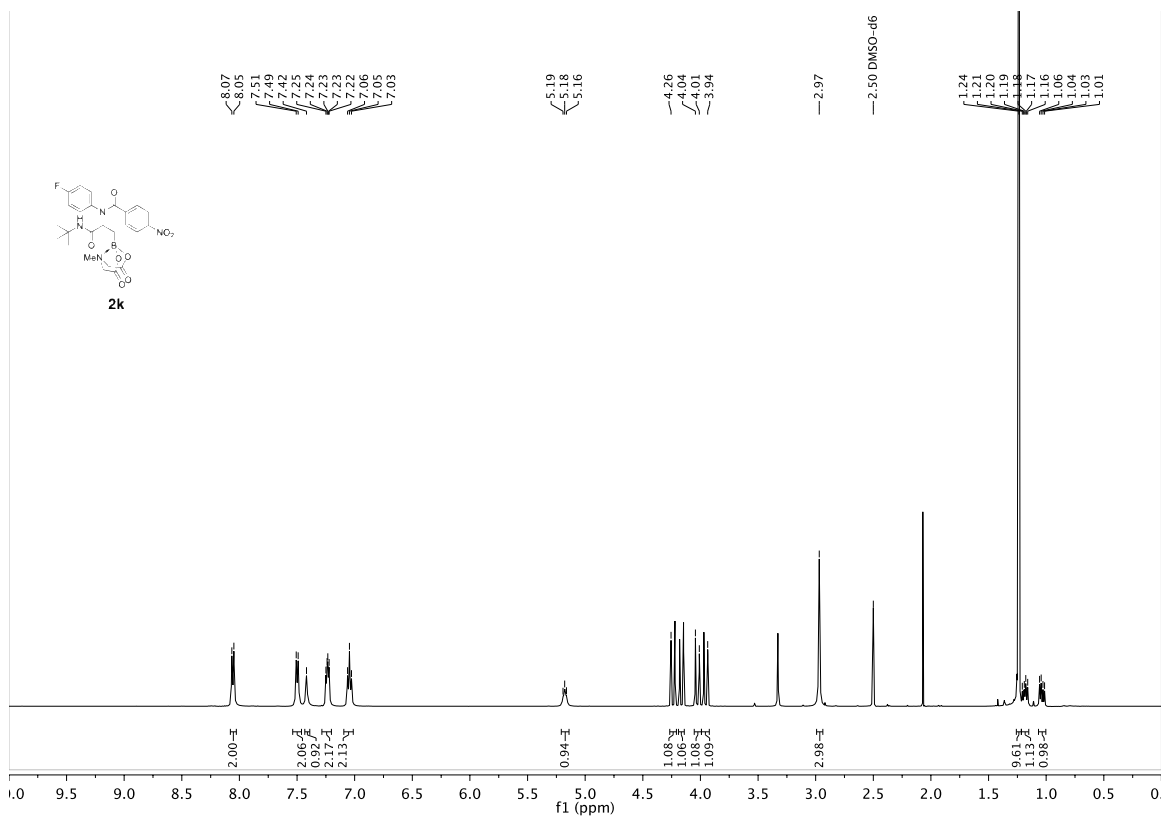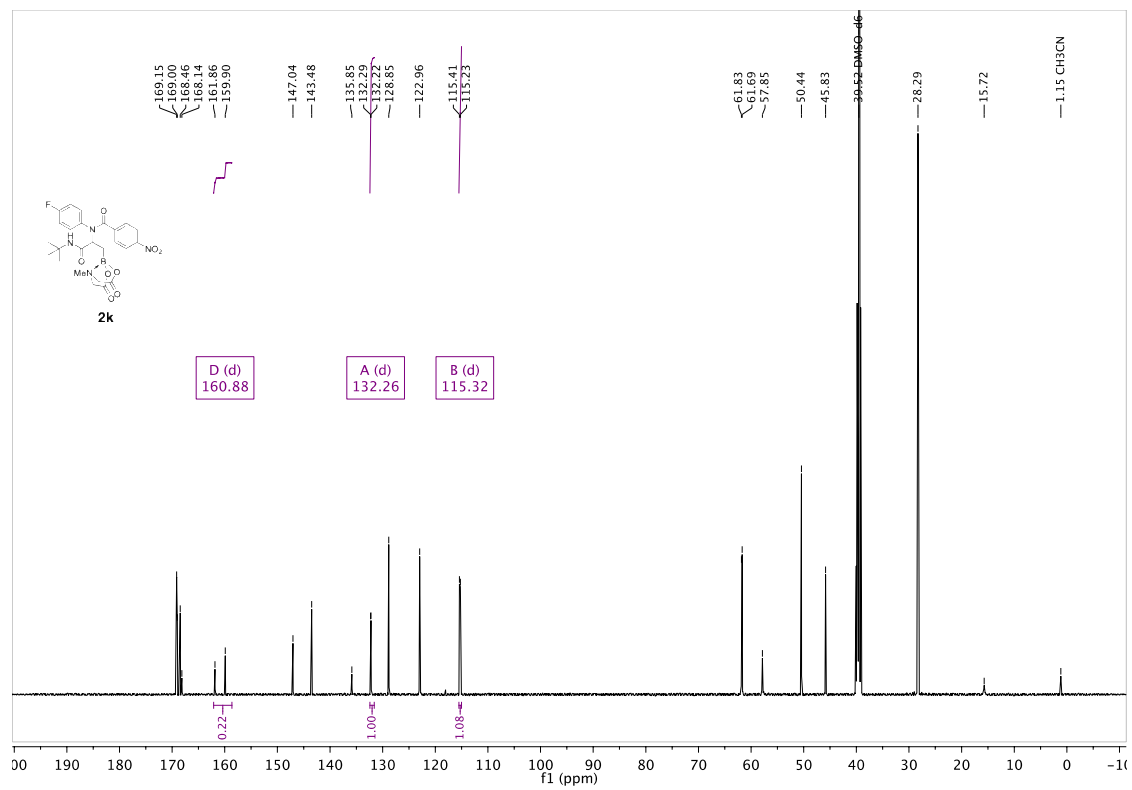

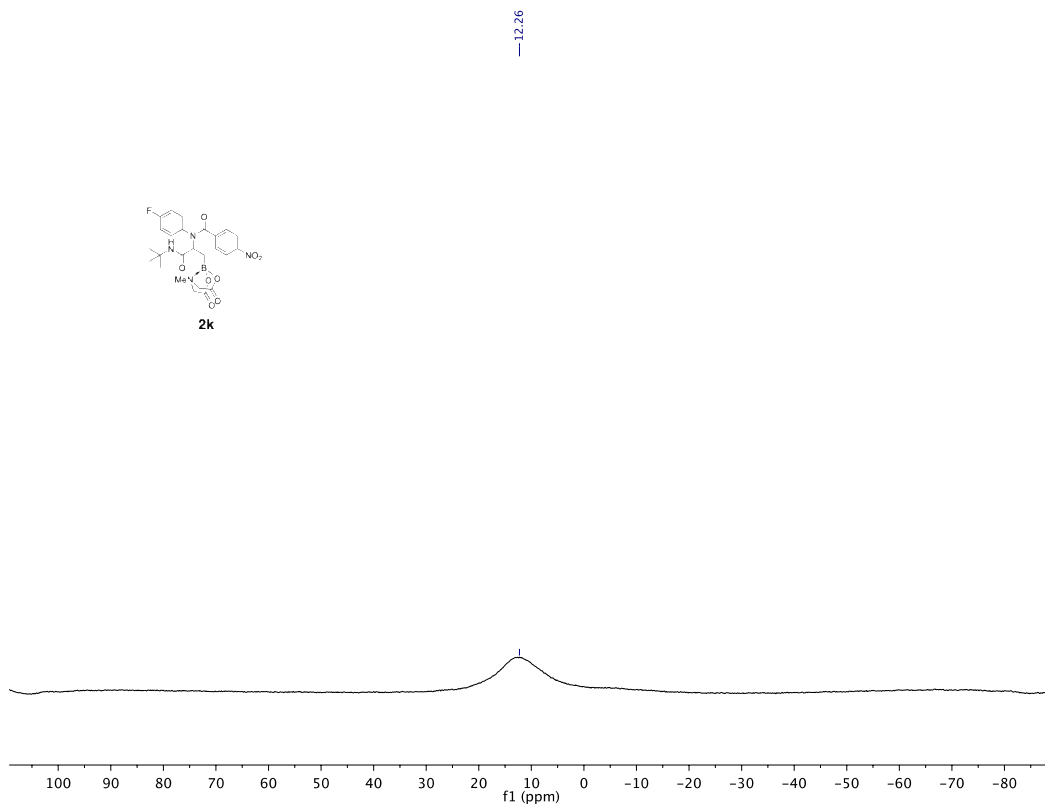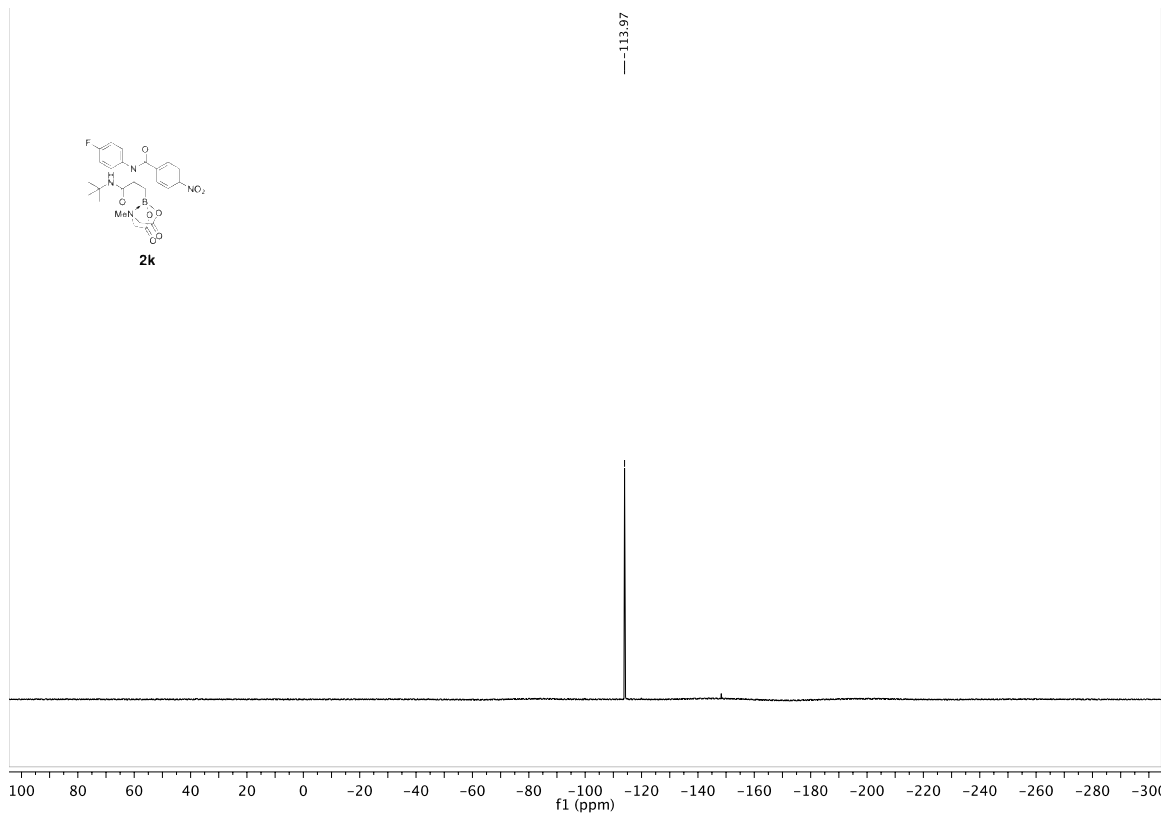

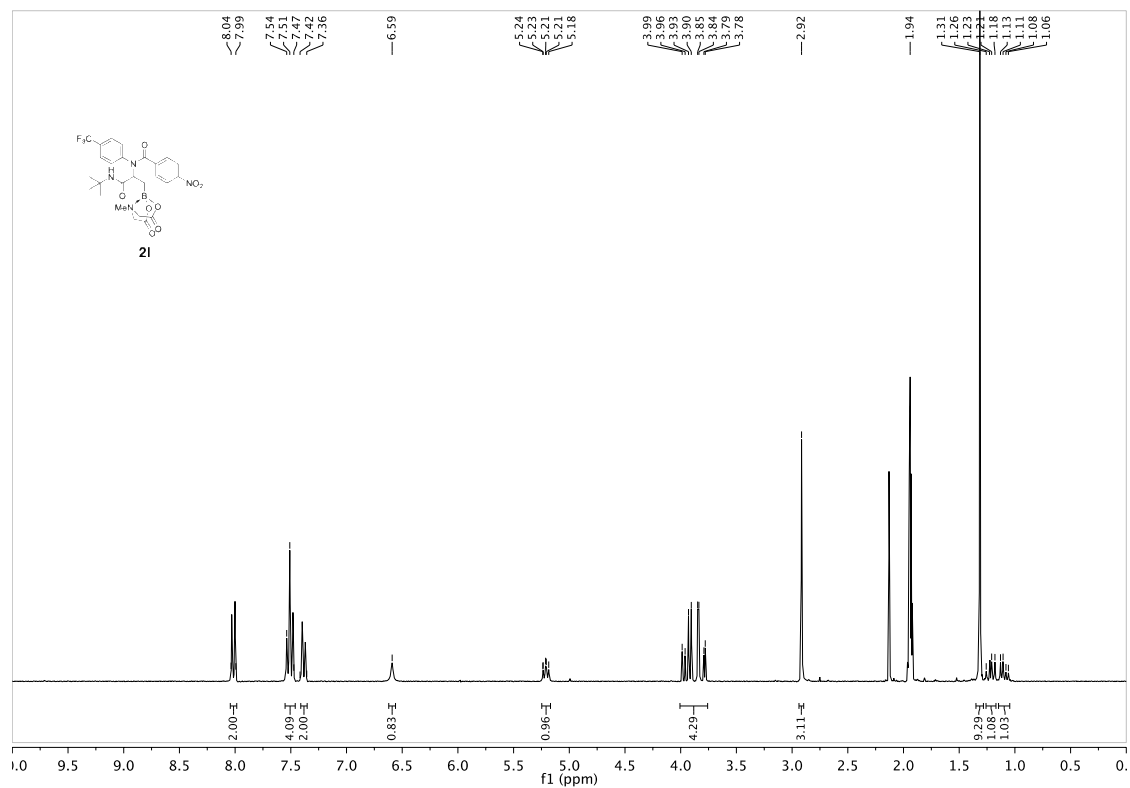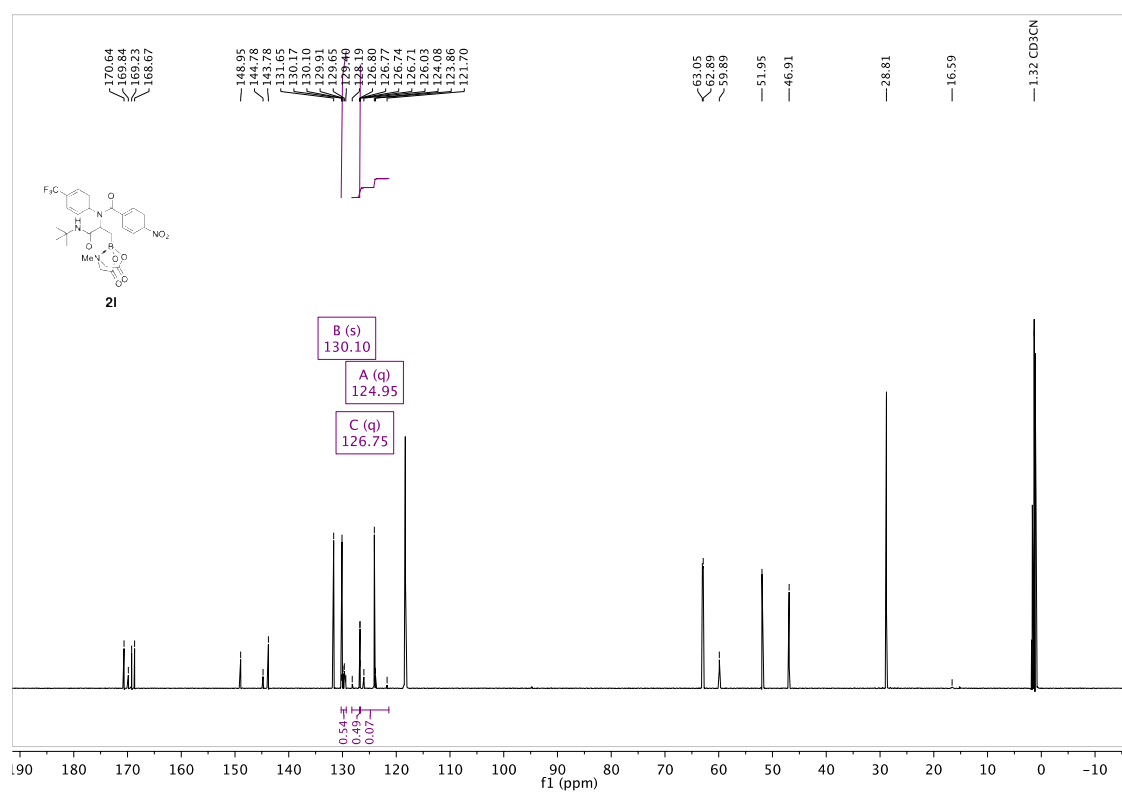

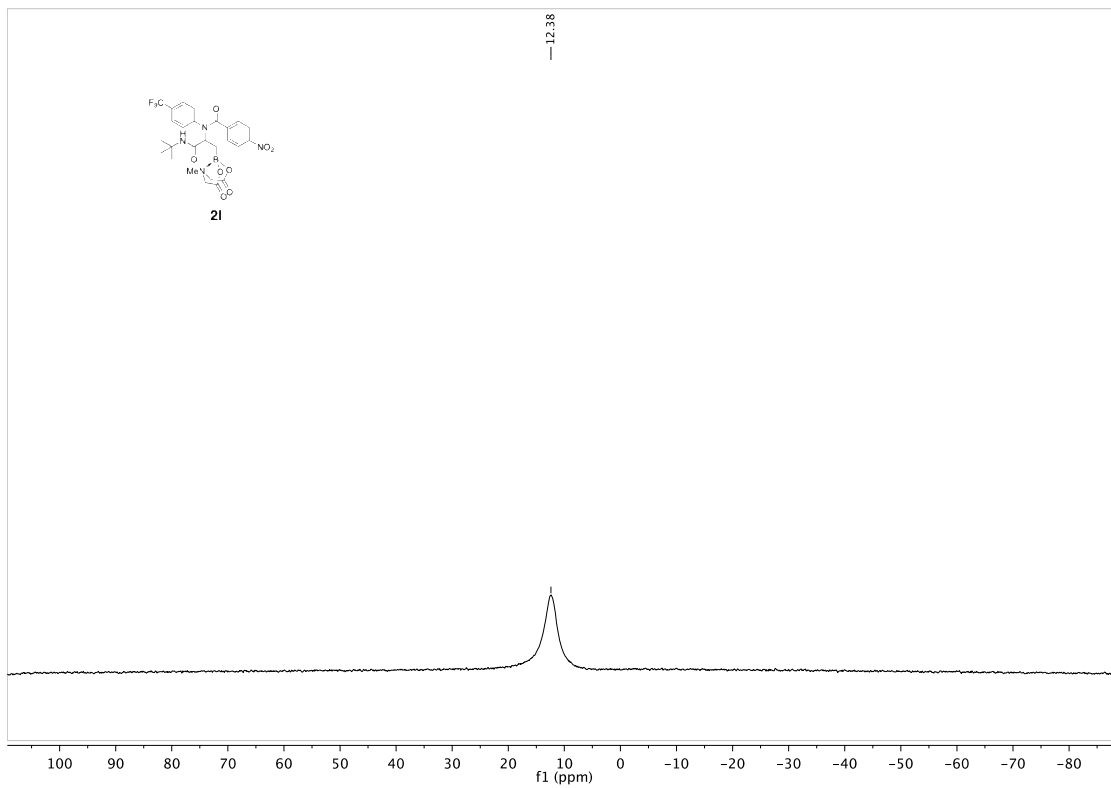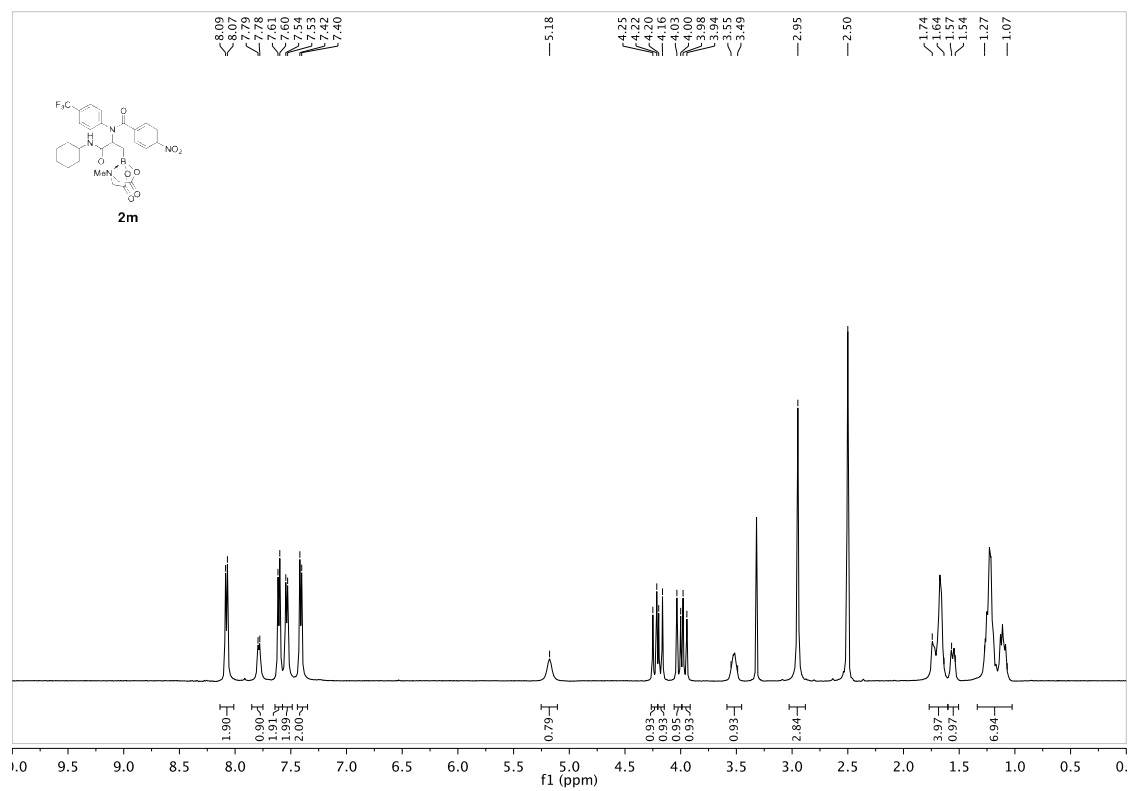



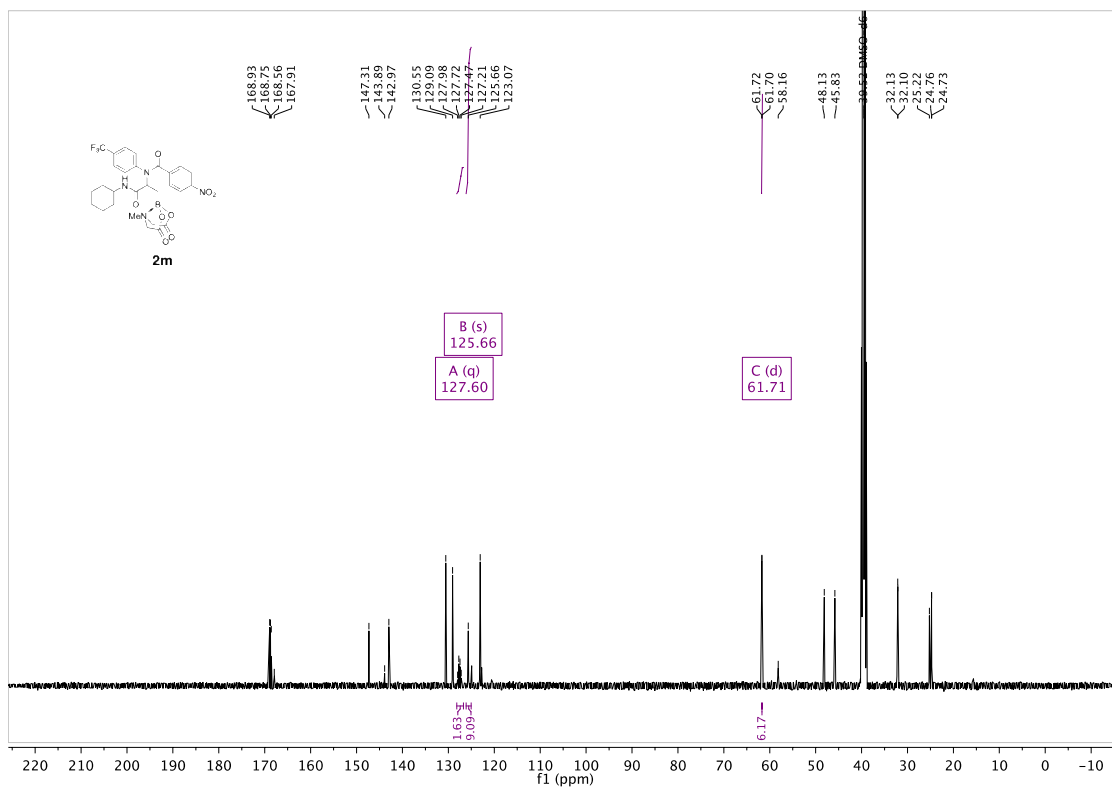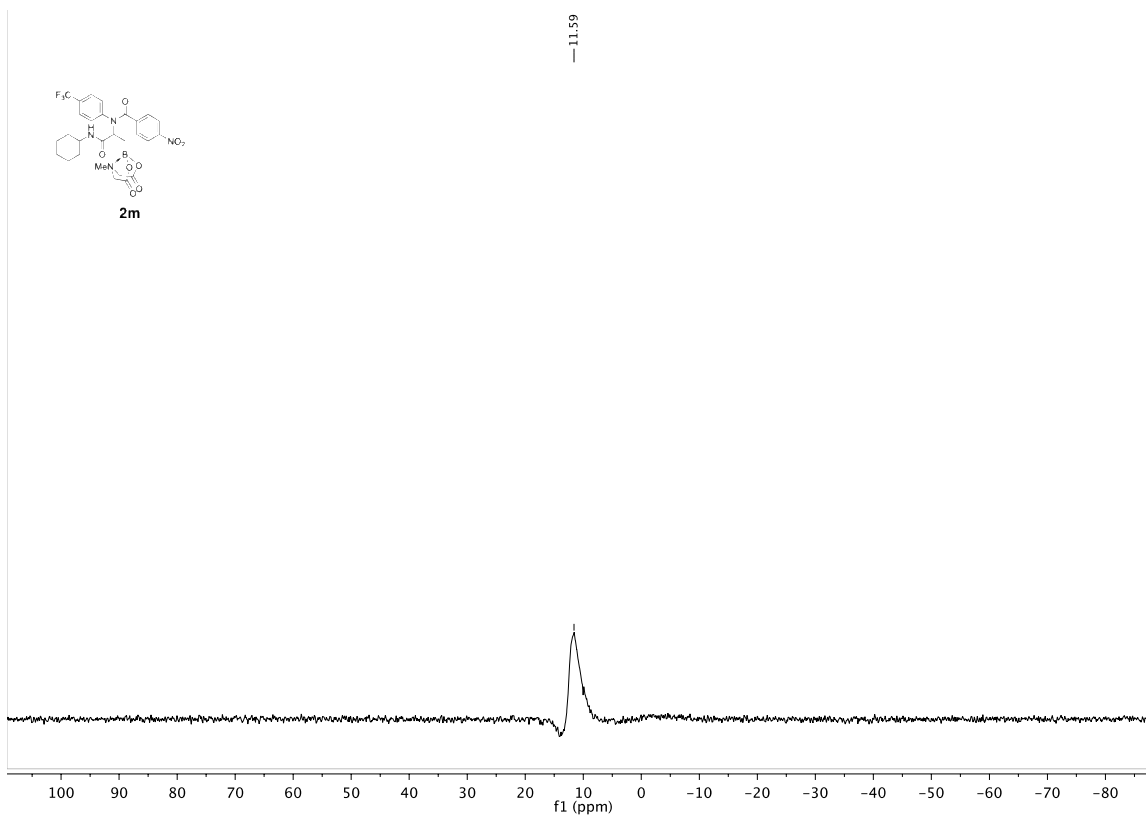

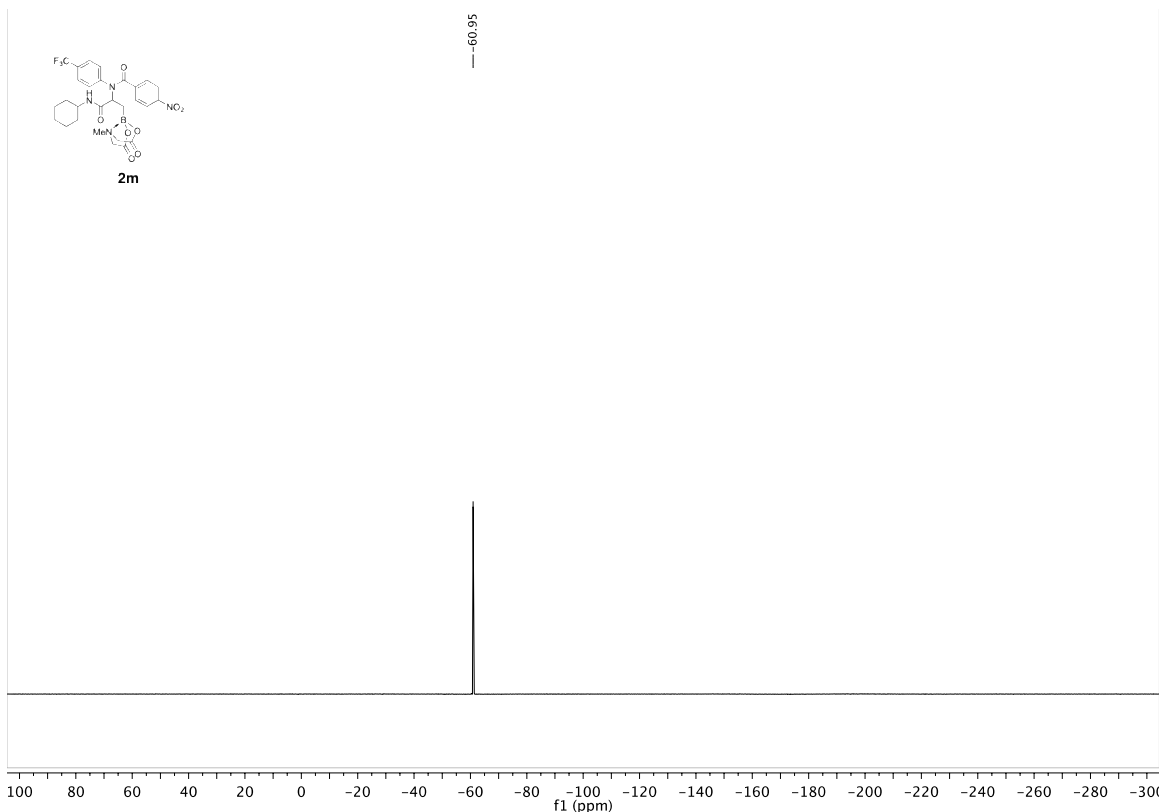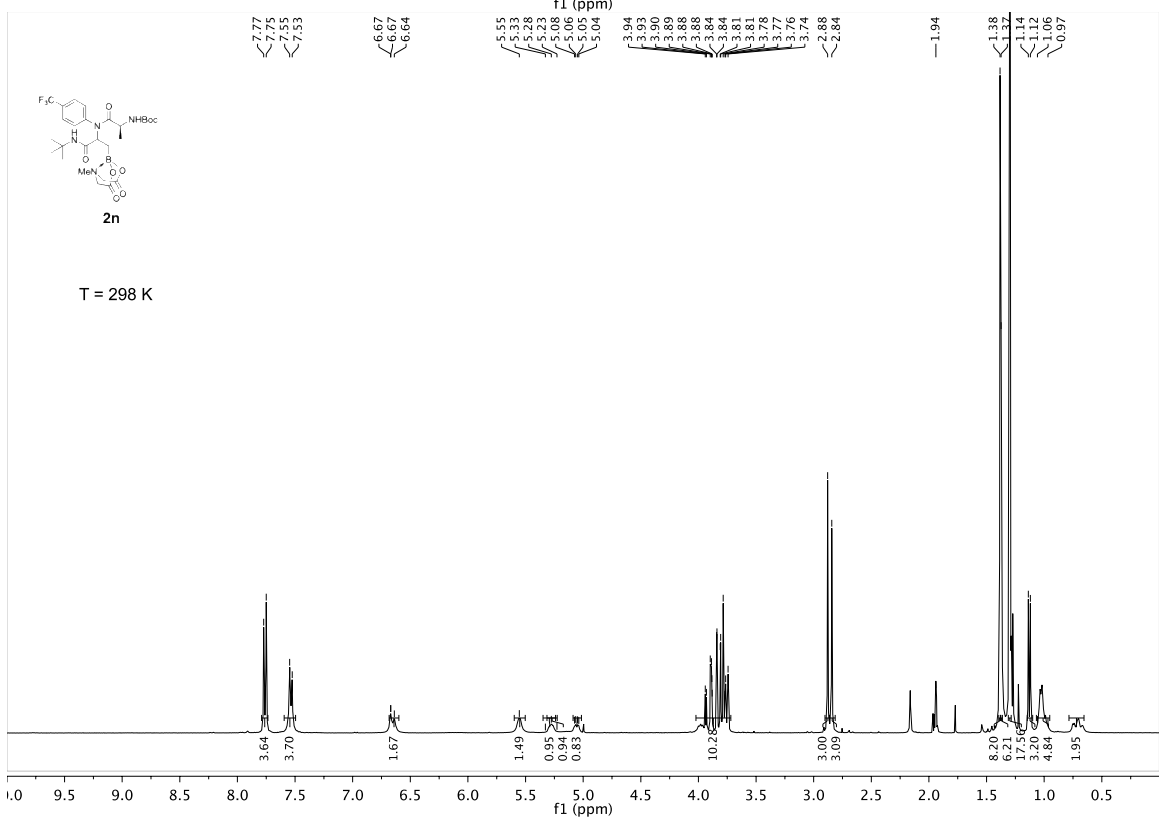

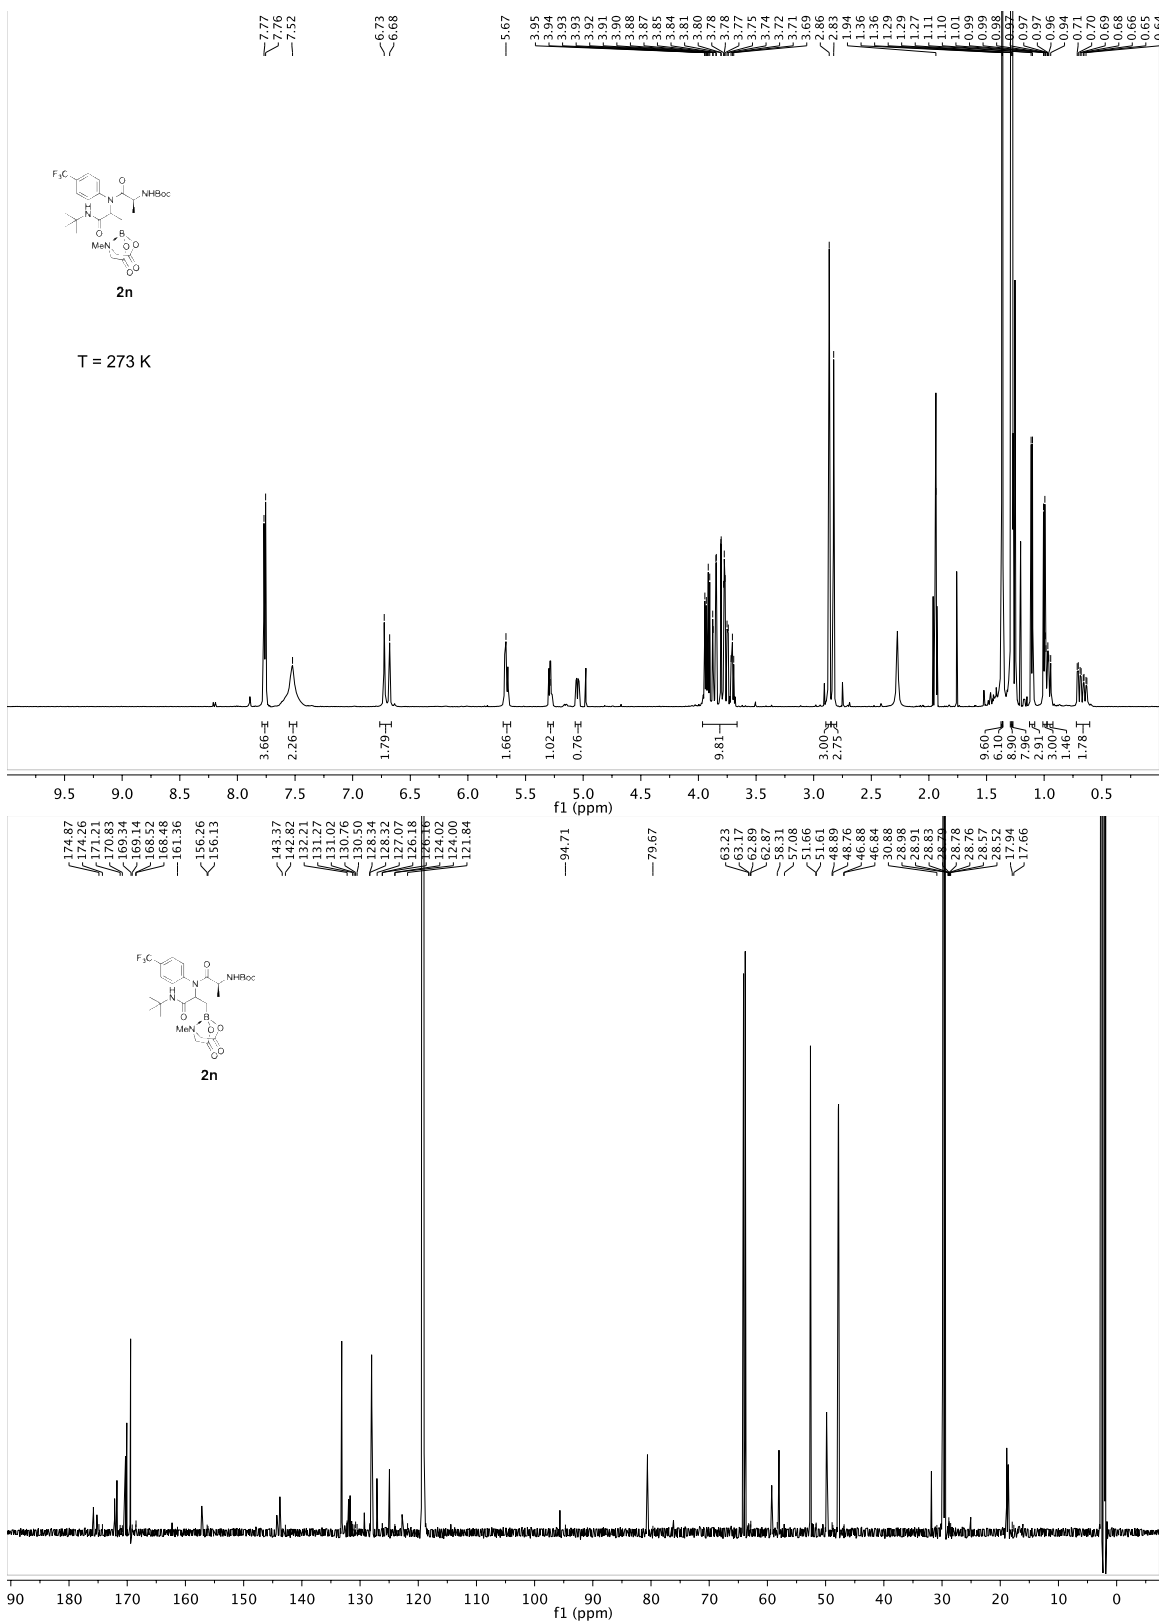

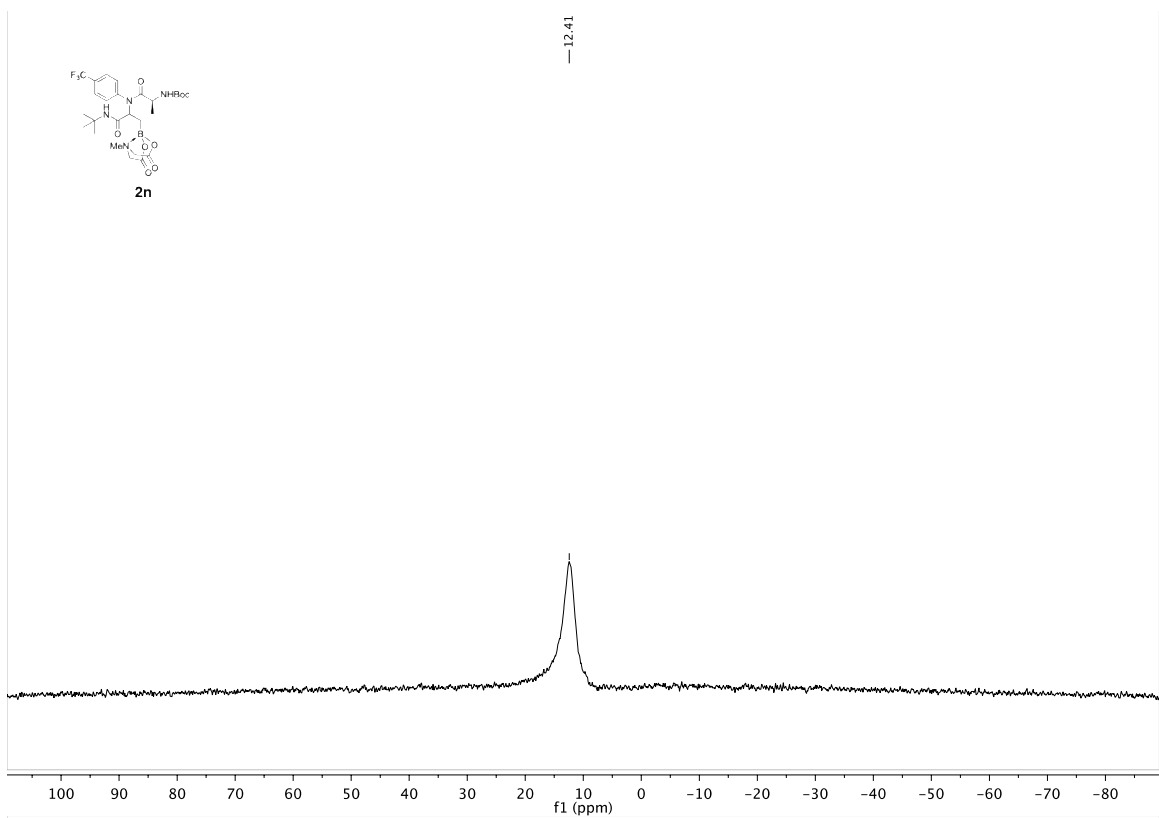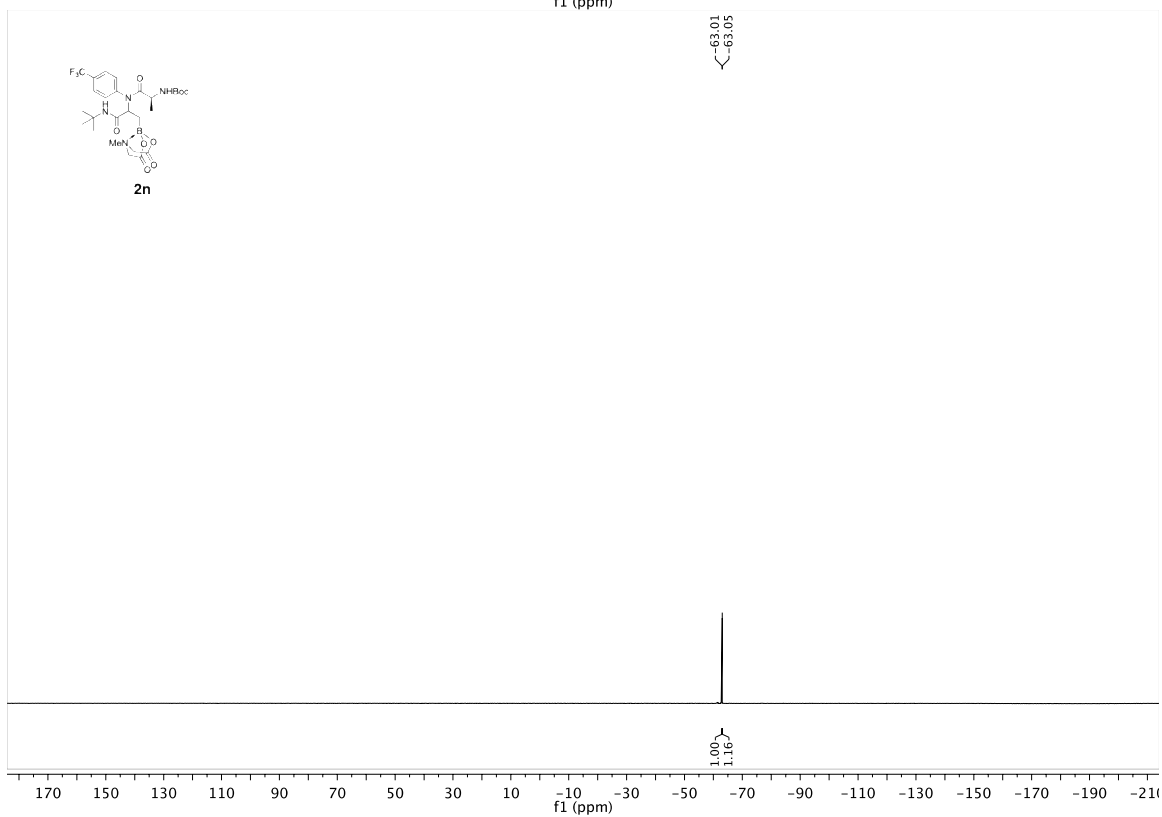

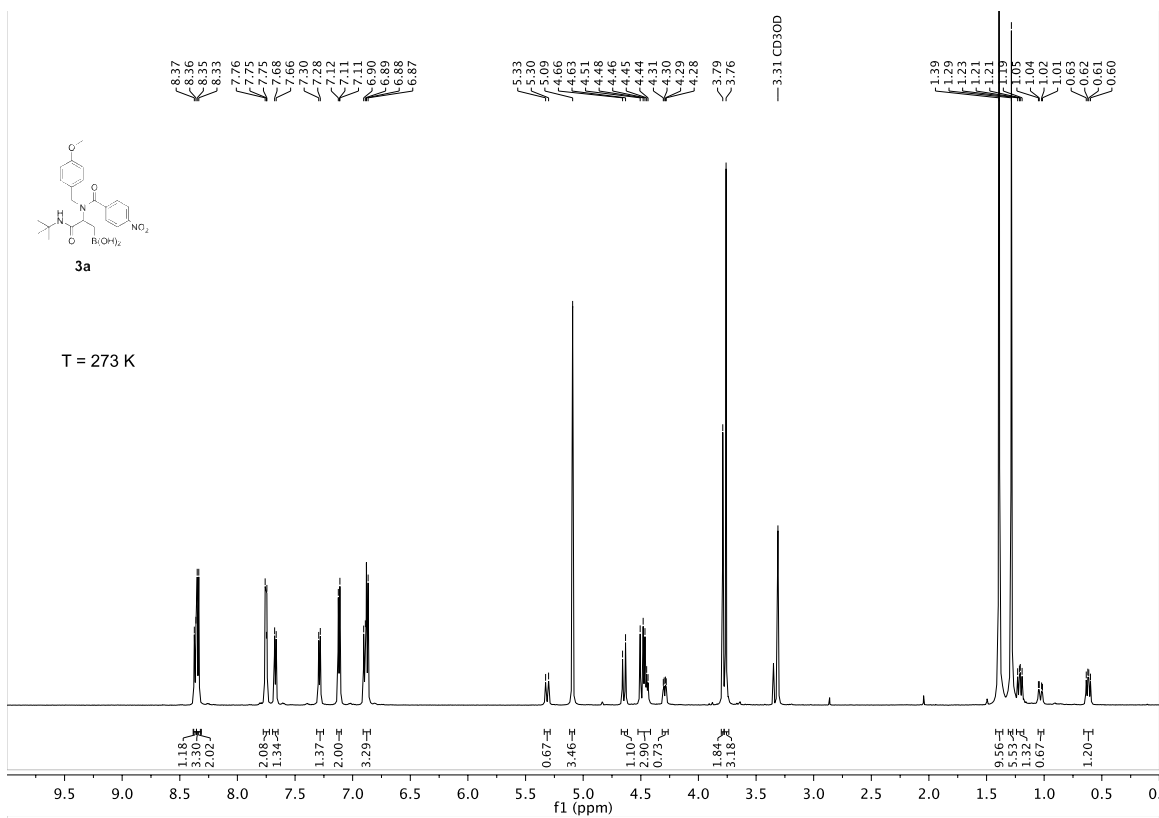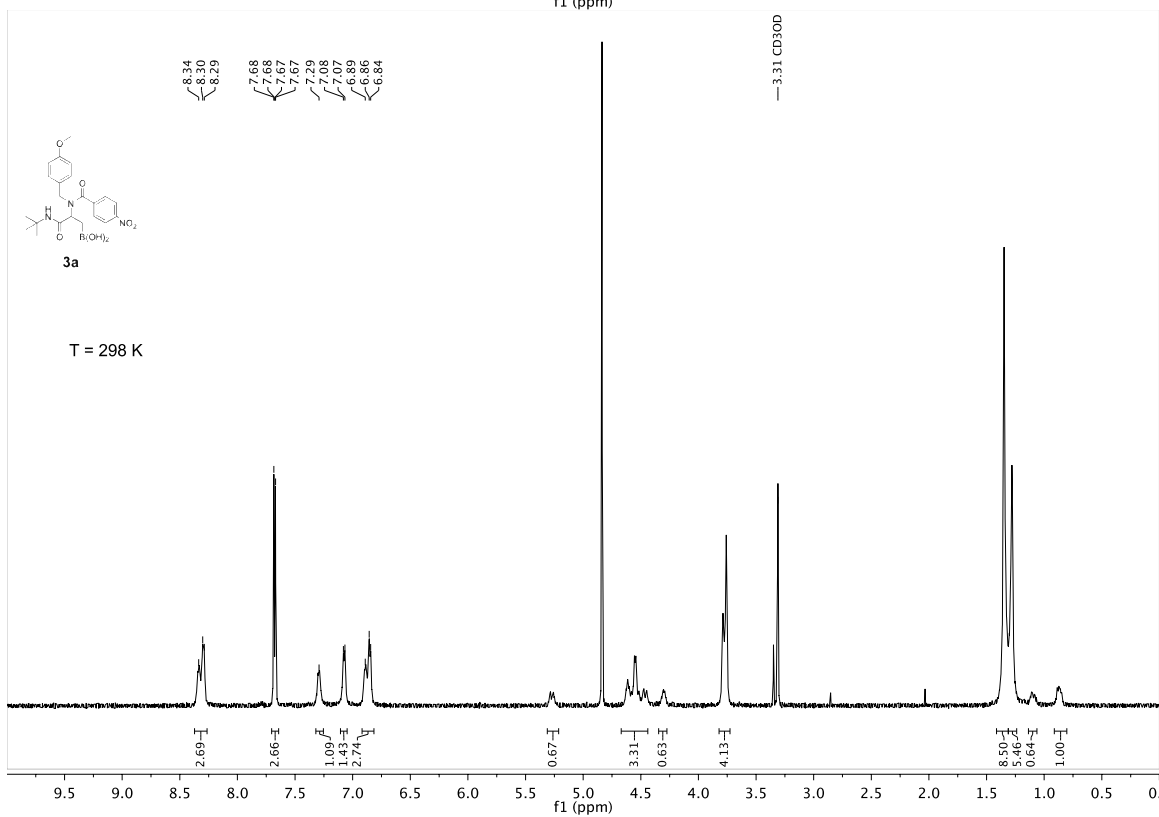

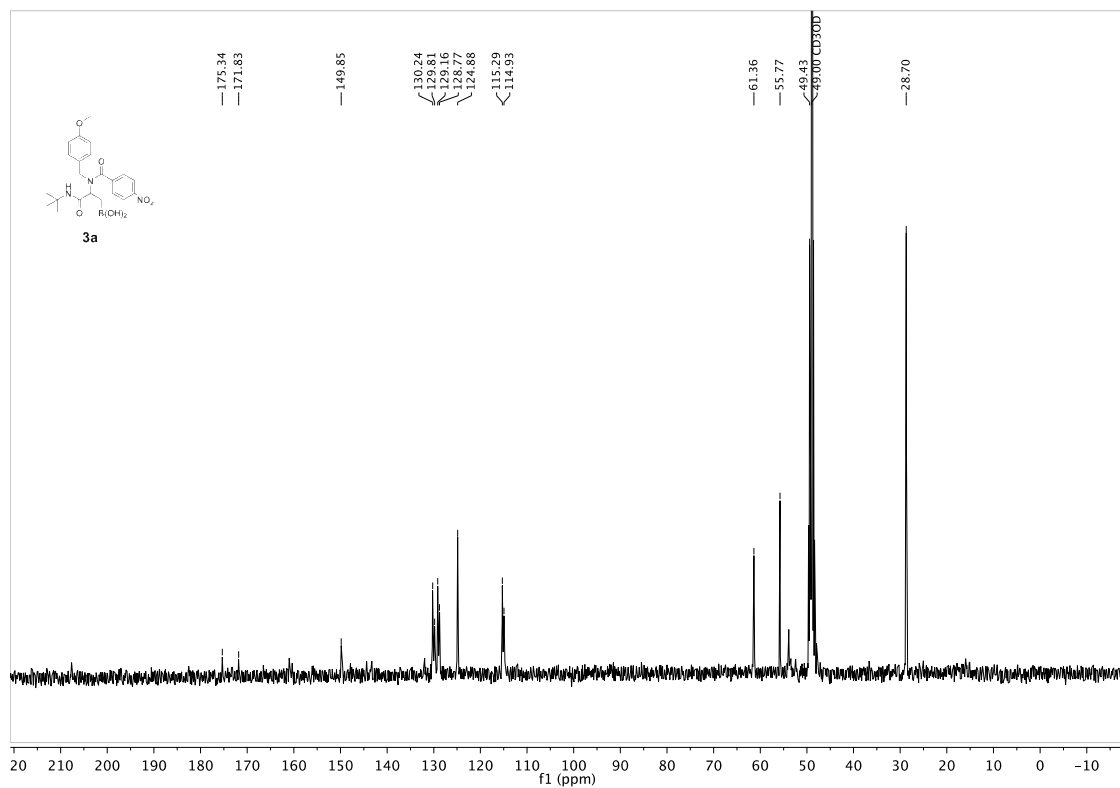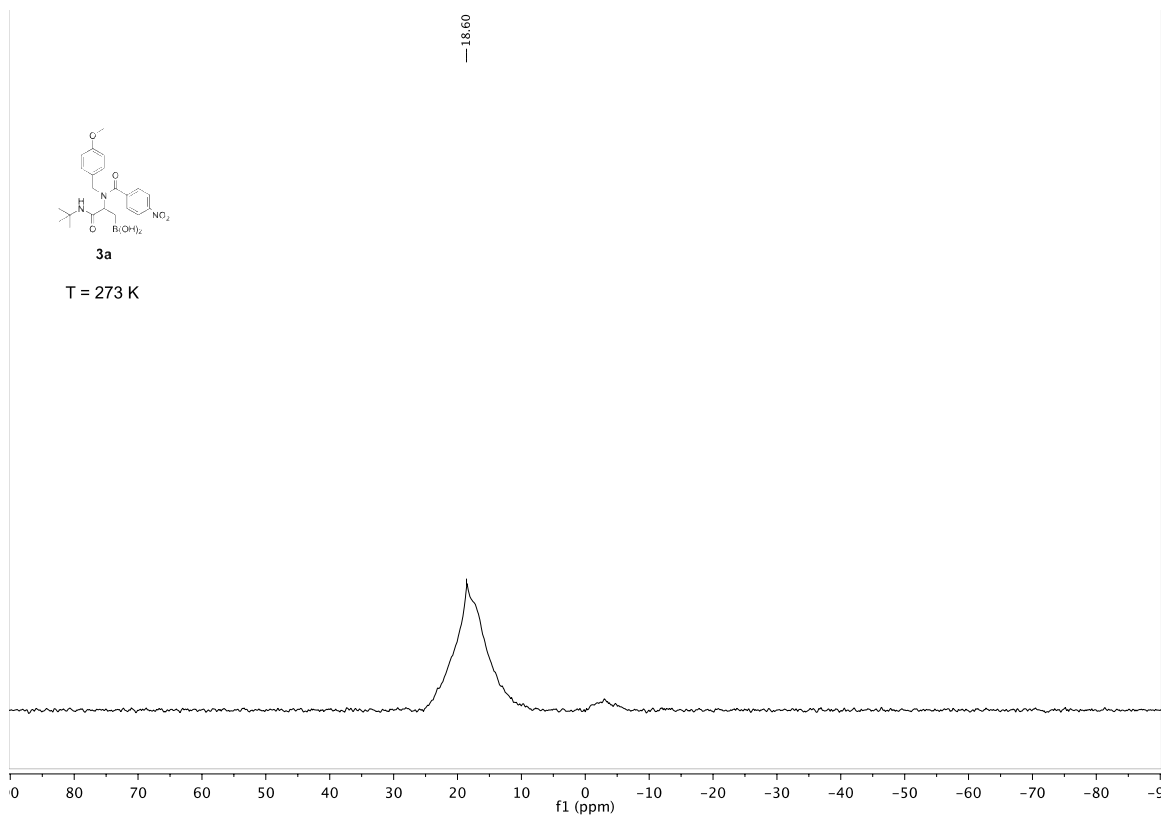

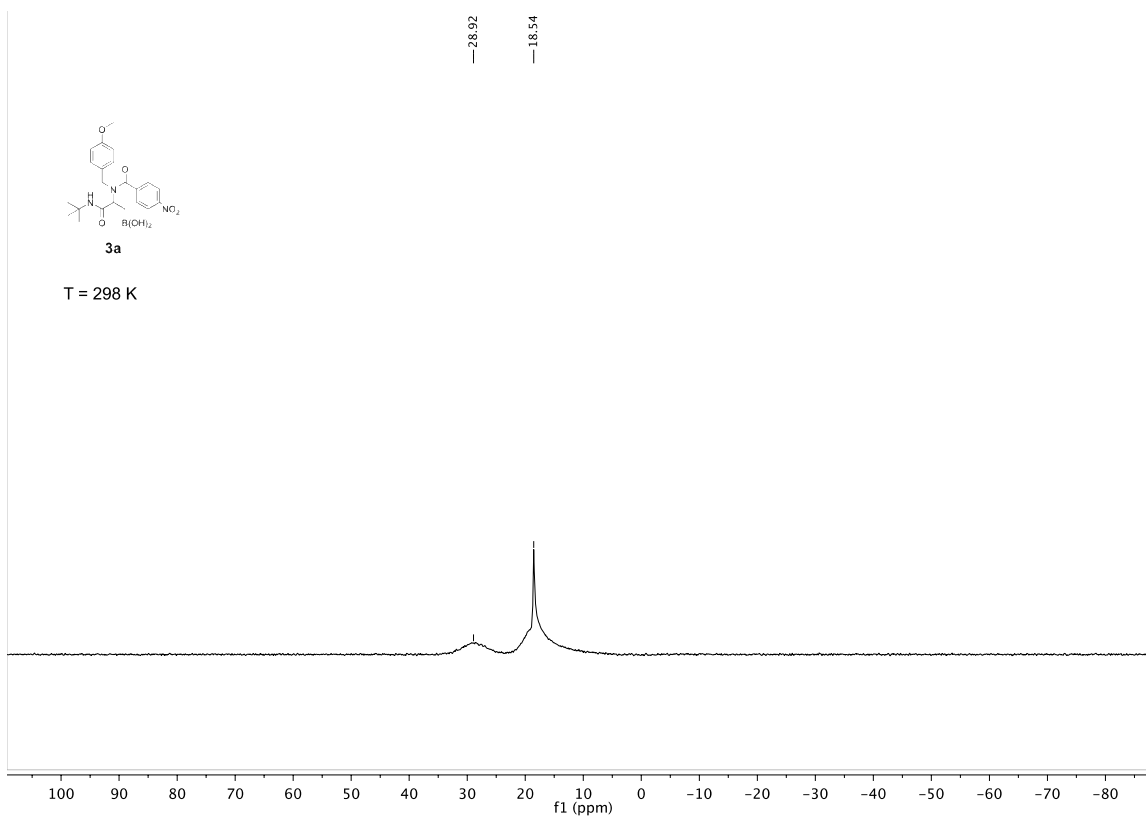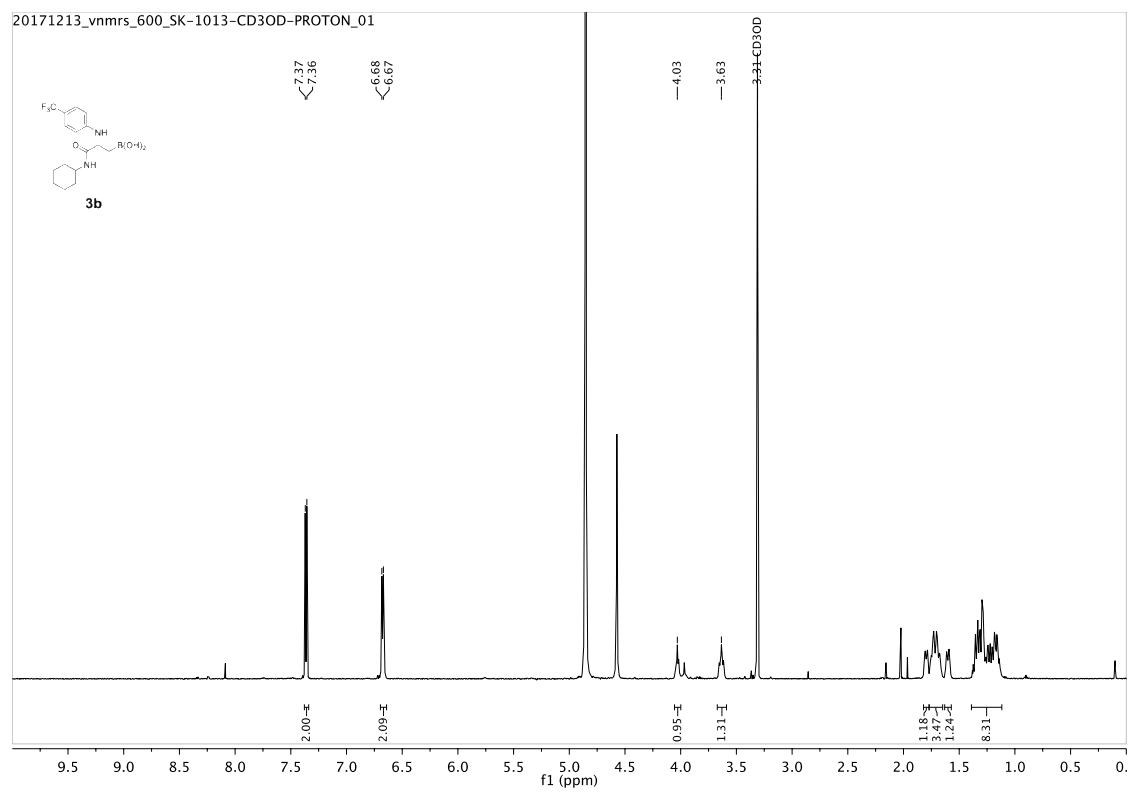

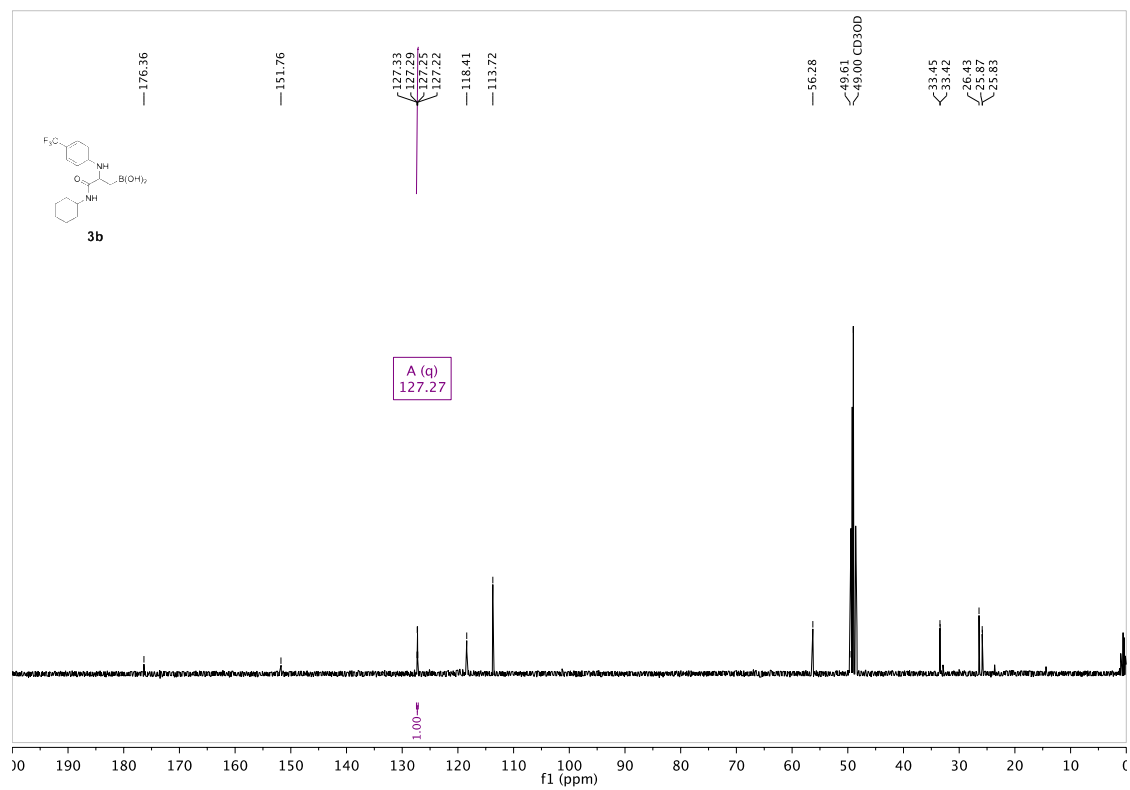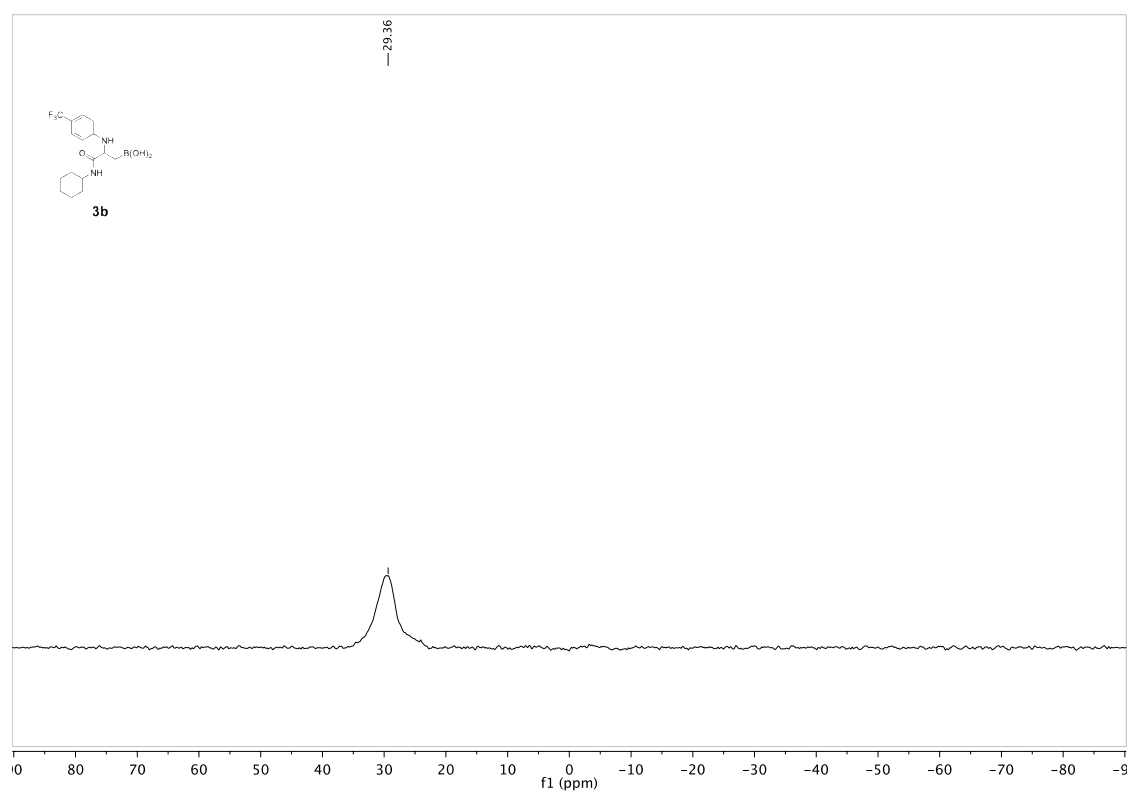



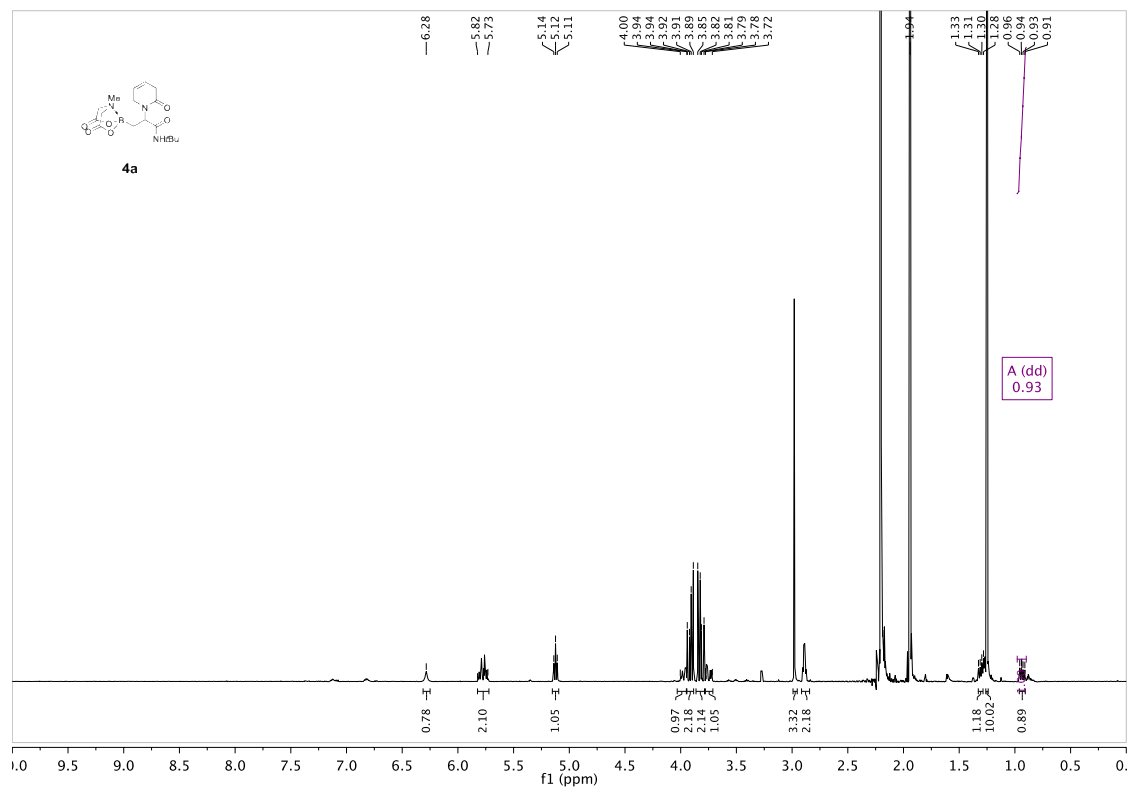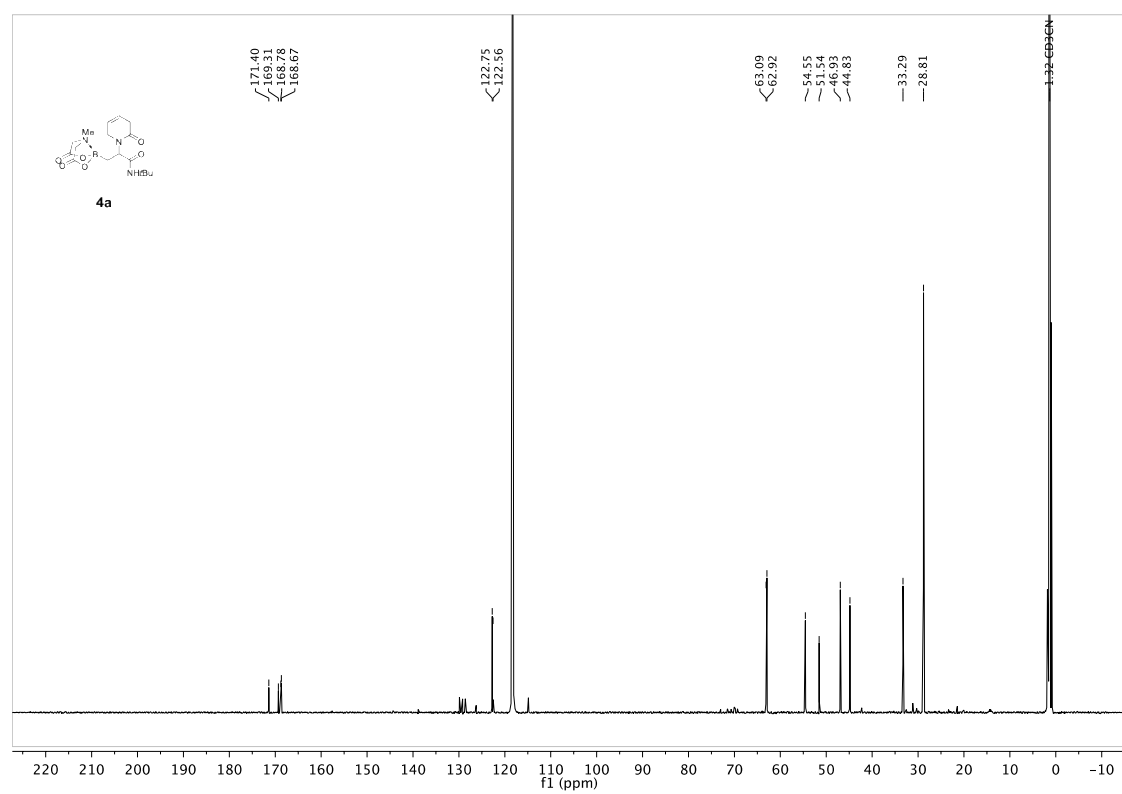

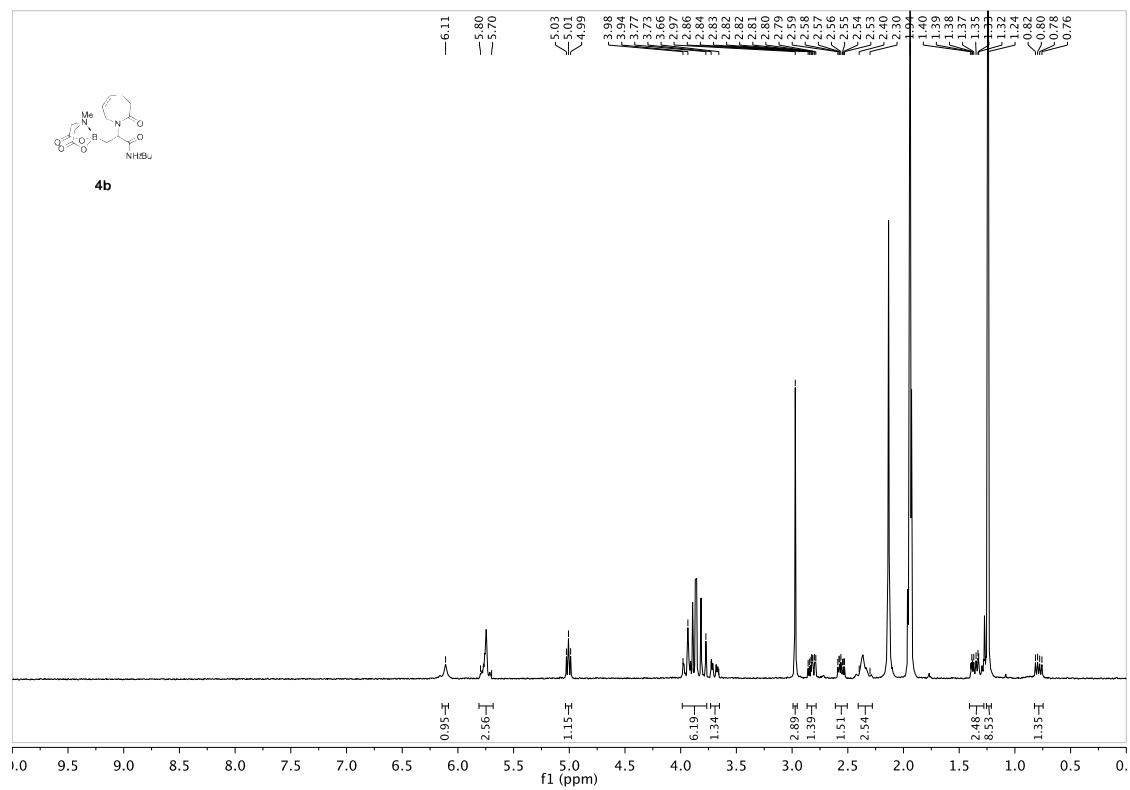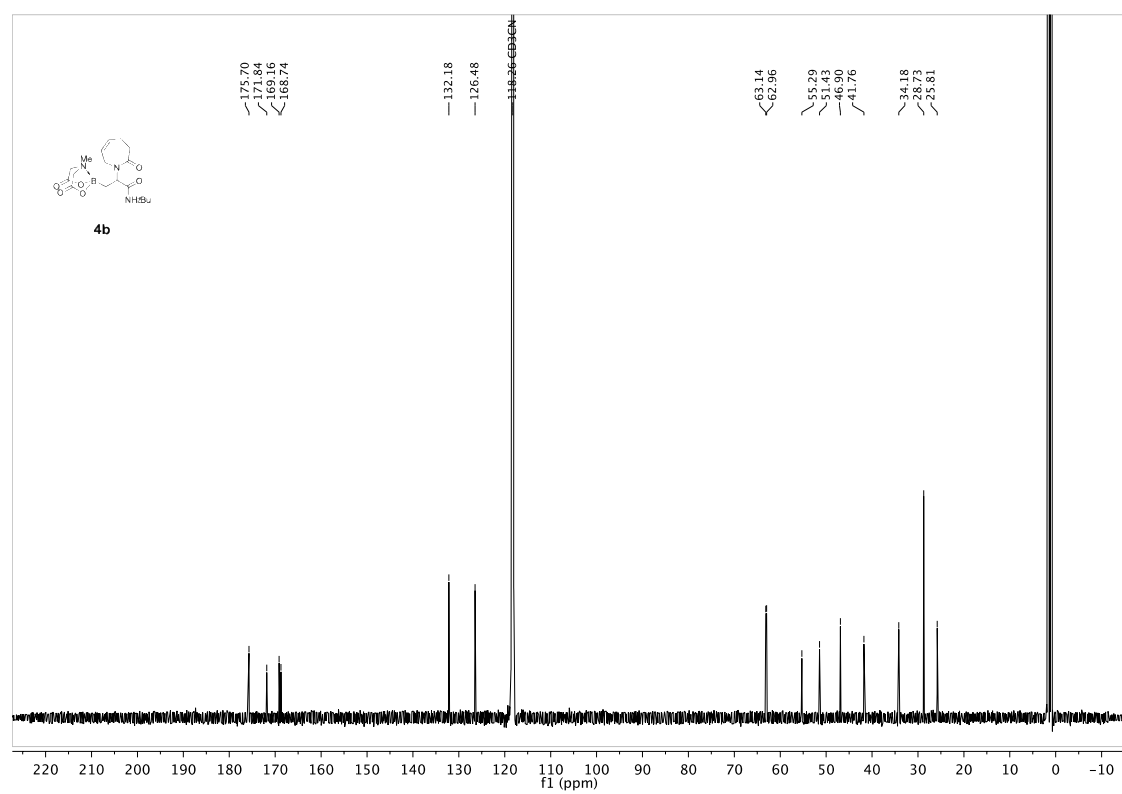



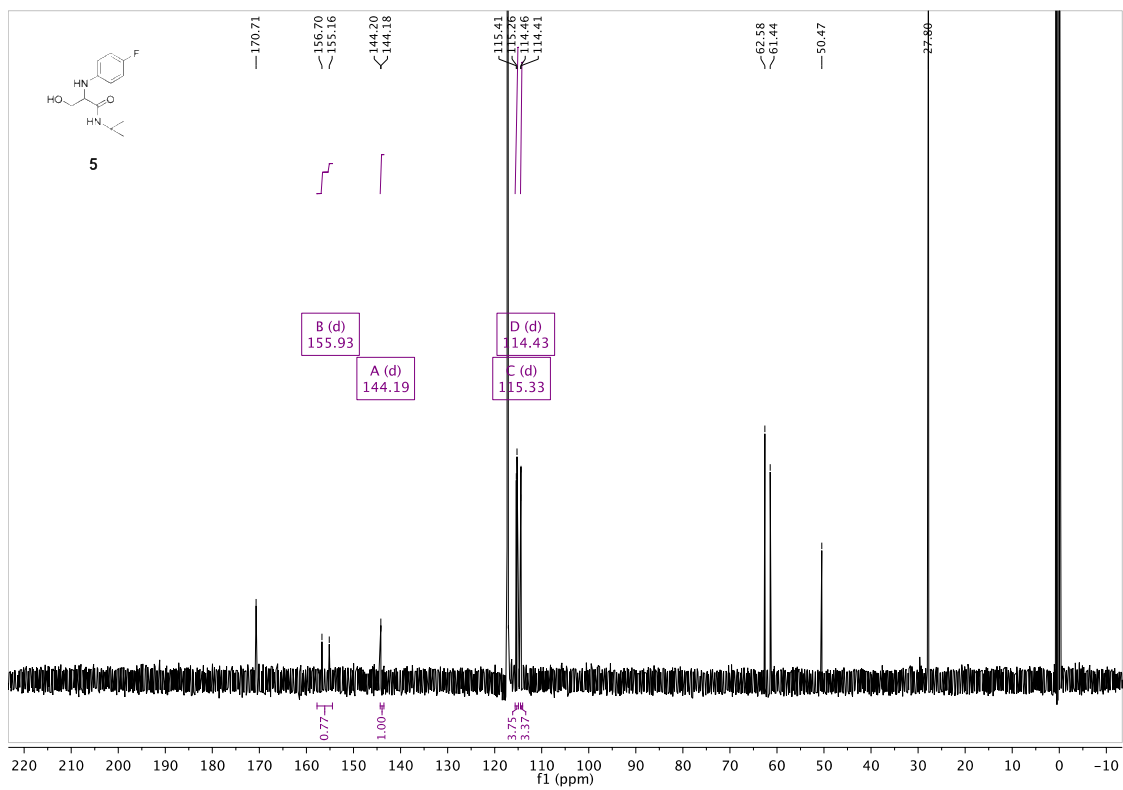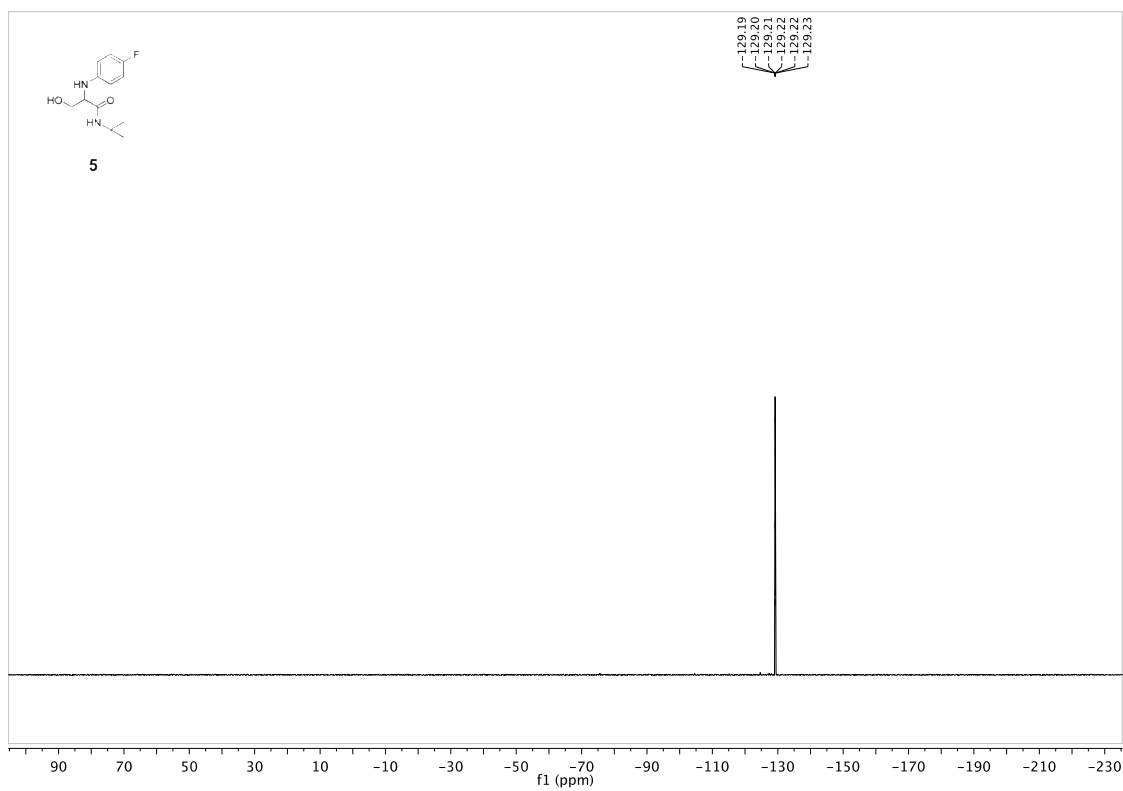

Supplement: Supplementary file 1 [file 11300402]
